# Supplementary material for: BmAbl1 Regulates Silk Protein Synthesis via Glutathione Metabolism in Bombyx mori
Source: MDPI journal article supplement (doi:10.3390/insects13110967), 2022-10-22
Supplement: s1 [file s1]

Table S5 GO enrichment analysis of DEGs

| ID         | Description                                              | ONTOLOGY | GeneRatio | BgRatio  | pvalue      | p.adjust    | qvalue      | geneID                                                                                                                                                                                                                                                                            | Count |
|------------|----------------------------------------------------------|----------|-----------|----------|-------------|-------------|-------------|-----------------------------------------------------------------------------------------------------------------------------------------------------------------------------------------------------------------------------------------------------------------------------------|-------|
| GO:0006749 | glutathione metabolic process                            | BP       | 7/54      | 25/1602  | 1.00E-05    | 1.00E-05    | 0.002556887 | 692678/692521/100141440/100141444/100862776/692941/100141445                                                                                                                                                                                                                      | 7     |
| GO:0006575 | cellular modified amino acid metabolic process           | BP       | 7/54      | 31/1602  | 4.69E-05    | 4.69E-05    | 0.005976837 | 692678/692521/100141440/100141444/100862776/692941/100141445                                                                                                                                                                                                                      | 7     |
| GO:0006790 | sulfur compound metabolic process                        | BP       | 7/54      | 46/1602  | 0.000644118 | 0.000644118 | 0.054750013 | 692678/692521/100141440/100141444/100862776/692941/100141445                                                                                                                                                                                                                      | 7     |
| GO:0046903 | secretion                                                | BP       | 3/54      | 10/1602  | 0.003675643 | 0.003675643 | 0.234322266 | 100301504/100174841/101746631                                                                                                                                                                                                                                                     | 3     |
| GO:0006570 | tyrosine metabolic process                               | BP       | 2/54      | 6/1602   | 0.015338684 | 0.015338684 | 0.706670931 | 693082/692758                                                                                                                                                                                                                                                                     | 2     |
| GO:0065008 | regulation of biological quality                         | BP       | 4/54      | 36/1602  | 0.030520826 | 0.030520826 | 0.706670931 | 100301504/100174841/692783/692564                                                                                                                                                                                                                                                 | 4     |
| GO:0019439 | aromatic compound catabolic process                      | BP       | 4/54      | 40/1602  | 0.042888502 | 0.042888502 | 0.706670931 | 693082/100499206/692686/101744496                                                                                                                                                                                                                                                 | 4     |
| GO:0030054 | cell junction                                            | CC       | 3/86      | 18/2125  | 0.03363747  | 0.03363747  | 0.996158161 | 100301504/692783/100233162                                                                                                                                                                                                                                                        | 3     |
| GO:0005576 | extracellular region                                     | CC       | 13/86     | 191/2125 | 0.04011497  | 0.04011497  | 0.996158161 | 733005/100862800/692397/101737284/101736553/100174841/692758/101746631/692973/692564/100188965/101735732/101735420                                                                                                                                                                | 13    |
| GO:0016614 | oxidoreductase activity, acting on CH-OH group of donors | MF       | 7/125     | 46/2665  | 0.004898963 | 0.004898963 | 0.495780974 | 100124423/732951/101746394/101738196/105842055/101741535/100302629                                                                                                                                                                                                                | 7     |
| GO:0016757 | glycosyltransferase activity                             | MF       | 9/125     | 74/2665  | 0.006849203 | 0.006849203 | 0.495780974 | 101742412/100500754/100862824/692850/100862789/101744496/100862828/732962/100862804                                                                                                                                                                                               | 9     |
| GO:0005543 | phospholipid binding                                     | MF       | 3/125     | 10/2665  | 0.009487855 | 0.009487855 | 0.495780974 | 778459/101738643/100301504                                                                                                                                                                                                                                                        | 3     |
| GO:0008289 | lipid binding                                            | MF       | 4/125     | 24/2665  | 0.023632741 | 0.023632741 | 0.495780974 | 778459/101738643/100301504/101743740                                                                                                                                                                                                                                              | 4     |
| GO:0004521 | endoribonuclease activity                                | MF       | 2/125     | 6/2665   | 0.028917868 | 0.028917868 | 0.495780974 | 100499531/100499206                                                                                                                                                                                                                                                               | 2     |
| GO:0046872 | metal ion binding                                        | MF       | 31/125    | 480/2665 | 0.031924999 | 0.031924999 | 0.495780974 | 101735538/692562/100852388/101738020/693082/692479/101741784/100127129/100134922/778459/100036578/733030/101742623/100301504/101740969/100379594/100862788/692758/101746631/100216496/100126178/100126160/100101183/692651/101743308/692709/692564/101745819/692863/692591/692368 | 31    |
| GO:0016758 | hexosyltransferase activity                              | MF       | 6/125     | 52/2665  | 0.032756584 | 0.032756584 | 0.495780974 | 101742412/100500754/100862789/100862828/732962/100862804                                                                                                                                                                                                                          | 6     |
| GO:0043169 | cation binding                                           | MF       | 31/125    | 481/2665 | 0.032774002 | 0.032774002 | 0.495780974 | 101735538/692562/100852388/101738020/693082/692479/101741784/100127129/100134922/778459/100036578/733030/101742623/100301504/101740969/100379594/100862788/692758/101746631/100216496/100126178/100126160/100101183/692651/101743308/692709/692564/101745819/692863/692591/692368 | 31    |
| GO:0004364 | glutathione transferase activity                         | MF       | 2/125     | 7/2665   | 0.039257027 | 0.039257027 | 0.495780974 | 100141440/692941                                                                                                                                                                                                                                                                  | 2     |
| GO:0008081 | phosphoric diester hydrolase activity                    | MF       | 2/125     | 7/2665   | 0.039257027 | 0.039257027 | 0.495780974 | 692531/101743953                                                                                                                                                                                                                                                                  | 2     |
| GO:0016763 | pentosyltransferase activity                             | MF       | 2/125     | 7/2665   | 0.039257027 | 0.039257027 | 0.495780974 | 692850/101744496                                                                                                                                                                                                                                                                  | 2     |
| GO:0030414 | peptidase inhibitor activity                             | MF       | 5/125     | 41/2665  | 0.040548974 | 0.040548974 | 0.495780974 | 100272179/692397/101737284/100272180/692973                                                                                                                                                                                                                                       | 5     |
| GO:0061134 | peptidase regulator activity                             | MF       | 5/125     | 41/2665  | 0.040548974 | 0.040548974 | 0.495780974 | 100272179/692397/101737284/100272180/692973                                                                                                                                                                                                                                       | 5     |
