# Supplementary material for: BmAbl1 Regulates Silk Protein Synthesis via Glutathione Metabolism in Bombyx mori
Source: MDPI journal article supplement (doi:10.3390/insects13110967), 2022-10-22
Supplement: s1 [file s1]

**Table S3.** The primers used to detect mutagenesis.

| Primer                | Sequence (5'-3')         |
|-----------------------|--------------------------|
| Abl1-gDNA-knock-out.F | TGACTTAGAGAGACGTACTGTTCA |
| Abl1-gDNA-knock-out.R | GCTGATGTCCATTGTGTCGC     |
| Abl1-mRNA-knock-out.F | AAGCCACGGGTGCCGAA        |
| Abl1-mRNA-knock-out.R | AACCTTCCCATCGGCGTCTT     |
