# Supplementary material for: BmAbl1 Regulates Silk Protein Synthesis via Glutathione Metabolism in Bombyx mori
Source: MDPI journal article supplement (doi:10.3390/insects13110967), 2022-10-22
Supplement: s1 [file s1]

Table S4 Differentially expressed genes between Bmab11- and Nistari

| GeneID      | Abl 1 | Abl 2 | Abl 3 | Nis 1 | Nis 2 | Nis 3 | baseMean   | log2FoldChange | lfcSE      | stat        | pvalue     | padj       |
|-------------|-------|-------|-------|-------|-------|-------|------------|----------------|------------|-------------|------------|------------|
| BMSK0012305 | 2369  | 1247  | 3244  | 0     | 0     | 0     | 1070.18411 | 13.44593423    | 1.29956891 | 10.34645729 | 4.34E-25   | 8.43E-23   |
| BMSK0008460 | 665   | 135   | 290   | 0     | 0     | 0     | 156.684831 | 10.67674666    | 1.24298109 | 8.589629218 | 8.73E-18   | 9.71E-16   |
| BMSK0012306 | 131   | 41    | 195   | 0     | 0     | 0     | 56.642558  | 9.206637752    | 1.29295874 | 7.120596693 | 1.07E-12   | 8.38E-11   |
| BMSK0011196 | 129   | 72    | 73    | 0     | 0     | 0     | 41.6493084 | 8.764166584    | 1.26704642 | 6.917005144 | 4.61E-12   | 3.31E-10   |
| BMSK0007503 | 101   | 52    | 70    | 0     | 0     | 0     | 33.9570709 | 8.469591351    | 1.28331783 | 6.599761276 | 4.12E-11   | 2.63E-09   |
| BMSK0000814 | 17    | 91    | 78    | 0     | 0     | 0     | 31.9848564 | 8.376104372    | 1.37016386 | 6.113213617 | 9.76E-10   | 4.98E-08   |
| BMSK0001583 | 1800  | 818   | 1135  | 2     | 6     | 2     | 567.905431 | 8.365570499    | 0.51287084 | 16.31126164 | 8.21E-60   | 6.24E-57   |
| BMSK0012909 | 63    | 35    | 51    | 0     | 0     | 0     | 22.8842858 | 7.899491522    | 1.32556476 | 5.959340329 | 2.53E-09   | 1.24E-07   |
| BMSK0009847 | 50    | 28    | 49    | 0     | 0     | 0     | 19.6325152 | 7.677829059    | 1.35034682 | 5.68582007  | 1.30E-08   | 5.71E-07   |
| BMSK0014042 | 44    | 28    | 37    | 0     | 0     | 0     | 16.8698311 | 7.458779197    | 1.3692279  | 5.447434435 | 5.11E-08   | 2.01E-06   |
| BMSK0016060 | 56    | 36    | 11    | 0     | 0     | 0     | 15.4854342 | 7.337184947    | 1.42853586 | 5.136157342 | 2.80E-07   | 9.65E-06   |
| BMSK0011560 | 644   | 996   | 1059  | 6     | 12    | 0     | 444.738676 | 7.203732645    | 1.00598753 | 7.160856772 | 8.02E-13   | 6.31E-11   |
| BMSK0012819 | 490   | 719   | 847   | 9     | 0     | 4     | 338.361982 | 7.113495775    | 1.08390413 | 6.562845913 | 5.28E-11   | 3.33E-09   |
| BMSK0000898 | 60    | 2     | 16    | 0     | 0     | 0     | 10.5552003 | 6.791982283    | 1.6038682  | 4.234750883 | 2.29E-05   | 0.00050788 |
| BMSK0006932 | 26    | 18    | 15    | 0     | 0     | 0     | 9.08572072 | 6.56628917     | 1.50900822 | 4.351393918 | 1.35E-05   | 0.00032055 |
| BMSK0010212 | 12    | 16    | 20    | 0     | 0     | 0     | 7.80467057 | 6.341926703    | 1.56946964 | 4.04080877  | 5.33E-05   | 0.00107751 |
| BMSK0001332 | 17    | 10    | 16    | 0     | 0     | 0     | 6.65287831 | 6.116517742    | 1.61170591 | 3.795058204 | 0.00014761 | 0.00259467 |
| BMSK0010659 | 21    | 7     | 16    | 0     | 0     | 0     | 6.59995704 | 6.108264458    | 1.62605407 | 3.7564953   | 0.00017231 | 0.00295485 |
| BMSK0001483 | 19    | 8     | 14    | 0     | 0     | 0     | 6.19883511 | 6.01694488     | 1.64154782 | 3.665409448 | 0.00024694 | 0.00408127 |
| BMSK0002432 | 404   | 235   | 207   | 2     | 2     | 8     | 130.689449 | 5.946378691    | 0.52583313 | 11.30848997 | 1.19E-29   | 3.20E-27   |
| BMSK0000953 | 76    | 30    | 34    | 1     | 0     | 1     | 21.1120629 | 5.892095175    | 1.19600344 | 4.926486814 | 8.37E-07   | 2.60E-05   |
| BMSK0001608 | 57    | 62    | 68    | 0     | 0     | 3     | 30.5008768 | 5.838466868    | 1.00112405 | 5.83191151  | 5.48E-09   | 2.55E-07   |
| BMSK0012908 | 15    | 9     | 10    | 0     | 0     | 0     | 5.21221081 | 5.765207123    | 1.70707035 | 3.377252224 | 0.00073214 | 0.01022864 |
| BMSK0010933 | 12    | 6     | 15    | 0     | 0     | 0     | 5.12238534 | 5.739247632    | 1.73008677 | 3.317317801 | 0.00090886 | 0.01217554 |
| BMSK0003512 | 32    | 2     | 4     | 0     | 0     | 0     | 5.0413059  | 5.729670572    | 1.84642577 | 3.103114488 | 0.00191496 | 0.02217023 |
| BMSK0005259 | 5     | 15    | 10    | 0     | 0     | 0     | 5.06794333 | 5.715301897    | 1.76260939 | 3.242523237 | 0.00118476 | 0.01501704 |
| BMSK0009664 | 22    | 4     | 8     | 0     | 0     | 0     | 4.83030136 | 5.663204998    | 1.77872684 | 3.183853127 | 0.00145329 | 0.01774878 |
| BMSK0001582 | 14    | 10    | 6     | 0     | 0     | 0     | 4.60075155 | 5.584837015    | 1.77335825 | 3.149299928 | 0.00163662 | 0.01941599 |
| BMSK0013841 | 10    | 10    | 8     | 0     | 0     | 0     | 4.43592385 | 5.528952294    | 1.78541885 | 3.096725618 | 0.00195671 | 0.02252266 |
| BMSK0015893 | 20    | 1     | 8     | 0     | 0     | 0     | 4.02705003 | 5.402386242    | 1.93507625 | 2.791820854 | 0.00524124 | 0.04919321 |
| BMSK0015706 | 17    | 22    | 6     | 1     | 0     | 0     | 7.38400945 | 5.262383749    | 1.59103744 | 3.307517239 | 0.00094127 | 0.01251074 |
| BMSK0001495 | 218   | 144   | 152   | 3     | 10    | 0     | 81.3866113 | 5.176366622    | 0.55778239 | 9.280261909 | 1.69E-20   | 2.37E-18   |
| BMSK0015459 | 18    | 30    | 27    | 0     | 0     | 2     | 12.6687429 | 5.133293008    | 1.31365235 | 3.907649542 | 9.32E-05   | 0.00173875 |
| BMSK0001840 | 38    | 17    | 16    | 0     | 0     | 2     | 10.9282395 | 4.922071815    | 1.33821691 | 3.678082203 | 0.00023499 | 0.00391214 |
| BMSK0000815 | 62    | 176   | 112   | 10    | 2     | 0     | 61.2411022 | 4.729087415    | 1.3277689  | 3.561679608 | 0.00036849 | 0.00583616 |
| BMSK0014318 | 22    | 30    | 28    | 0     | 3     | 0     | 13.4273467 | 4.7073743037   | 1.17591655 | 4.000065335 | 6.33E-05   | 0.00123973 |
| BMSK0009609 | 40    | 20    | 25    | 0     | 3     | 0     | 13.331444  | 4.698203583    | 1.16488798 | 4.033180588 | 5.50E-05   | 0.00111064 |
| BMSK0000841 | 28    | 12    | 19    | 2     | 0     | 0     | 9.29138808 | 4.635735704    | 1.37396263 | 3.373989656 | 0.00074087 | 0.01030331 |
| BMSK0009293 | 2035  | 1957  | 825   | 84    | 46    | 48    | 785.586355 | 4.571013758    | 0.33901504 | 13.48321808 | 1.96E-41   | 9.95E-39   |
| BMSK0009842 | 56    | 29    | 14    | 0     | 4     | 0     | 15.2968337 | 4.489349156    | 1.0998652  | 4.081726706 | 4.47E-05   | 0.00092476 |
| BMSK0009901 | 7165  | 6286  | 10064 | 19    | 1146  | 30    | 3923.42808 | 4.372050993    | 1.48412184 | 2.945884144 | 0.00322033 | 0.03404295 |
| BMSK0009445 | 99    | 51    | 51    | 5     | 4     | 0     | 31.9129653 | 4.282753804    | 0.7261339  | 5.898022154 | 6.38E-09   | 1.76E-07   |
| BMSK0015680 | 1470  | 165   | 570   | 37    | 20    | 40    | 327.240707 | 4.15815505     | 0.78579359 | 5.29166326  | 1.21E-07   | 4.44E-06   |
| BMSK0009982 | 321   | 151   | 253   | 4     | 16    | 17    | 116.636857 | 4.130266027    | 0.4196758  | 9.841563586 | 7.45E-23   | 1.28E-20   |
| BMSK0004276 | 972   | 1840  | 1671  | 143   | 34    | 54    | 783.766168 | 4.118519031    | 0.80045901 | 5.145196648 | 2.67E-07   | 9.23E-06   |
| BMSK0012370 | 50    | 4     | 27    | 2     | 2     | 0     | 12.2086112 | 4.06942808     | 1.17231026 | 3.471289318 | 0.00051797 | 0.00768358 |
| BMSK0000956 | 123   | 29    | 94    | 1     | 7     | 5     | 38.6323287 | 4.058541206    | 0.68441343 | 5.929955573 | 3.03E-09   | 1.46E-07   |
| BMSK0012606 | 42    | 19    | 20    | 1     | 4     | 0     | 12.9039638 | 3.864713606    | 1.03832043 | 3.722081825 | 0.00019759 | 0.00336932 |
| BMSK0014580 | 990   | 600   | 636   | 10    | 56    | 86    | 366.845746 | 3.725411555    | 0.7311966  | 5.09495195  | 3.49E-07   | 1.17E-05   |
| BMSK0001508 | 29    | 26    | 16    | 0     | 2     | 3     | 11.9409268 | 3.700726215    | 1.04402343 | 3.544677344 | 0.00039309 | 0.00611979 |
| BMSK0007302 | 34    | 23    | 2     | 1     | 1     | 2     | 9.53182679 | 3.663917131    | 1.24124893 | 2.951798827 | 0.00315929 | 0.03344743 |
| BMSK0005027 | 11050 | 9428  | 8457  | 702   | 689   | 697   | 4903.78903 | 3.635619038    | 0.18697992 | 19.44390085 | 3.28E-84   | 4.28E-81   |
| BMSK0012822 | 35816 | 54279 | 55708 | 6601  | 1524  | 2314  | 25762.6955 | 3.623312316    | 0.79840505 | 4.538188138 | 5.67E-06   | 0.00014584 |
| BMSK0009169 | 47    | 14    | 46    | 0     | 4     | 4     | 17.4889954 | 3.585443696    | 0.90144621 | 3.97743501  | 6.7E-05    | 0.00135508 |
| BMSK0013624 | 18    | 22    | 12    | 4     | 0     | 0     | 9.1018244  | 3.493377636    | 1.24554112 | 2.804706783 | 0.00503624 | 0.04761201 |
| BMSK0014693 | 76    | 2     | 60    | 2     | 0     | 8     | 21.759939  | 3.475178054    | 1.03962229 | 3.342731396 | 0.00082958 | 0.01131871 |
| BMSK0014704 | 29    | 26    | 16    | 2     | 4     | 0     | 12.0936547 | 3.453236337    | 1.01576342 | 3.399646274 | 0.00067473 | 0.00952874 |
| BMSK0015448 | 208   | 54    | 56    | 16    | 6     | 2     | 49.7444175 | 3.403380461    | 0.64512974 | 5.275497729 | 1.32E-07   | 4.81E-06   |
| BMSK0007680 | 1290  | 208   | 619   | 36    | 92    | 45    | 332.358638 | 3.391079422    | 0.63939214 | 5.303598884 | 1.14E-07   | 4.18E-06   |
| BMSK0001189 | 266   | 249   | 240   | 8     | 38    | 22    | 130.620889 | 3.388980495    | 0.38748448 | 8.746106505 | 2.21E-18   | 2.70E-16   |
| BMSK0001838 | 14    | 35    | 10    | 0     | 5     | 1     | 10.8090361 | 3.32250358     | 1.13911643 | 2.925293913 | 0.00344131 | 0.03575749 |
| BMSK0015128 | 273   | 168   | 237   | 10    | 30    | 22    | 115.251478 | 3.317349331    | 0.37031162 | 8.958264196 | 3.30E-19   | 4.24E-17   |
| BMSK0001312 | 766   | 56    | 276   | 34    | 48    | 12    | 168.388471 | 3.252806727    | 0.9407827  | 3.457553717 | 0.0005451  | 0.00793139 |
| BMSK0011604 | 661   | 431   | 392   | 50    | 65    | 32    | 253.112626 | 3.217484941    | 0.28224433 | 11.2402078  | 2.59E-29   | 6.38E-27   |
| BMSK0005604 | 44    | 23    | 43    | 6     | 2     | 3     | 18.9645731 | 3.114717522    | 0.78445459 | 3.970551718 | 7.17E-05   | 0.00138891 |
| BMSK0005739 | 586   | 394   | 120   | 36    | 27    | 46    | 185.380225 | 3.110057382    | 0.42859096 | 7.256469894 | 3.97E-13   | 3.27E-11   |
| BMSK0001333 | 3005  | 1568  | 1419  | 10    | 288   | 335   | 1007.99704 | 3.101895684    | 1.11094992 | 2.792111169 | 0.00523654 | 0.04919321 |
| BMSK0014113 | 104   | 51    | 50    | 14    | 7     | 0     | 34.5795234 | 3.048052371    | 0.69837456 | 4.364495147 | 1.27E-05   | 0.0003035  |
| BMSK0012099 | 768   | 485   | 489   | 66    | 56    | 70    | 301.30965  | 2.99090926     | 0.25820568 | 11.58343725 | 5.00E-31   | 1.38E-28   |
| BMSK0010999 | 1771  | 1380  | 1345  | 232   | 193   | 96    | 792.941745 | 2.941362018    | 0.27804329 | 10.57879156 | 3.74E-26   | 7.58E-24   |
| BMSK0001313 | 634   | 50    | 324   | 54    | 24    | 26    | 161.650853 | 2.928262324    | 0.90895557 | 3.221568174 | 0.00127491 | 0.0159329  |
| BMSK0002557 | 47    | 46    | 30    | 6     | 5     | 4     | 22.0289399 | 2.886951042    | 0.69755215 | 4.138688451 | 3.49E-05   | 0.00074229 |
| BMSK0012506 | 62    | 60    | 78    | 10    | 7     | 8     | 36.3341909 | 2.858809462    | 0.56218048 | 5.085216489 | 3.67E-07   | 1.22E-05   |
| BMSK0002350 | 2663  | 961   | 2511  | 34    | 331   | 404   | 1059.93489 | 2.855591614    | 0.9097327  | 3.138934777 | 0.00169563 | 0.02001389 |
| BMSK0012505 | 429   | 409   | 436   | 43    | 58    | 70    | 231.817543 | 2.769393338    | 0.28474341 | 9.72592597  | 2.34E-22   | 3.74E-20   |
| BMSK0007723 | 29    | 26    | 20    | 8     | 2     | 0     | 13.6381182 | 2.697569617    | 0.96768284 | 2.78765884  | 0.00530904 | 0.0494606  |
| BMSK0011641 | 4096  | 2362  | 2176  | 376   | 311   | 488   | 1520.21188 | 2.66274809     | 0.23902462 | 11.14005775 | 8.01E-29   | 1.92E-26   |
| BMSK0016048 | 645   | 162   | 259   | 30    | 62    | 56    | 179.152549 | 2.610767275    | 0.37524491 | 6.957502173 | 3.46E-12   | 2.55E-10   |
| BMSK0005619 | 122   | 26    | 60    | 16    | 8     | 4     | 35.155849  | 2.602188881    | 0.64813608 | 4.01488046  | 5.95E-05   | 0.00118471 |
| BMSK0000960 | 162   | 31    | 97    | 11    | 19    | 11    | 49.2091506 | 2.598474122    | 0.54730405 | 4.747770698 | 2.06E-06   | 5.88E-05   |
| BMSK0011640 | 1599  | 1107  | 1014  | 169   | 138   | 244   | 671.567034 | 2.561968924    | 0.25667516 | 9.981366888 | 1.84E-23   | 3.42E-21   |
| BMSK0005260 | 49    | 50    | 27    | 6     | 12    | 2     |            |                |            |             |            |            |

|             |       |       |       |      |      |      |            |             |            |             |            |            |
|-------------|-------|-------|-------|------|------|------|------------|-------------|------------|-------------|------------|------------|
| BMSK0013995 | 767   | 545   | 480   | 81   | 97   | 118  | 328.415584 | 2.428263928 | 0.24749586 | 9.811331605 | 1.01E-22   | 1.67E-20   |
| BMSK0009839 | 2108  | 1566  | 1425  | 158  | 574  | 177  | 939.899957 | 2.409323602 | 0.31555359 | 7.635228107 | 2.25E-14   | 2.10E-12   |
| BMSK0005110 | 58    | 54    | 60    | 14   | 16   | 0    | 32.4047875 | 2.405709683 | 0.69991239 | 3.437158305 | 0.00058785 | 0.00843235 |
| BMSK0003290 | 18    | 40    | 32    | 4    | 2    | 10   | 17.8667973 | 2.391997396 | 0.82488008 | 2.899812286 | 0.00373386 | 0.03789102 |
| BMSK0009306 | 1155  | 978   | 996   | 75   | 245  | 241  | 586.344145 | 2.375496529 | 0.30343835 | 7.828596838 | 4.93E-15   | 4.74E-13   |
| BMSK0009942 | 243   | 216   | 202   | 7    | 74   | 43   | 124.247554 | 2.35382215  | 0.46223029 | 5.092314783 | 3.54E-07   | 1.18E-05   |
| BMSK0003165 | 53    | 84    | 38    | 8    | 18   | 7    | 34.0028311 | 2.349611021 | 0.60455512 | 3.886512461 | 0.00010169 | 0.00187049 |
| BMSK0006035 | 69    | 86    | 49    | 11   | 10   | 16   | 39.2192081 | 2.331686594 | 0.54247273 | 4.298255876 | 1.72E-05   | 0.0003986  |
| BMSK0013470 | 102   | 38    | 28    | 1    | 25   | 6    | 29.4723044 | 2.258048086 | 0.7466473  | 3.024249995 | 0.0024925  | 0.02759601 |
| BMSK0008915 | 21047 | 17035 | 17297 | 1819 | 7274 | 2159 | 10505.5403 | 2.243145682 | 0.57038875 | 3.932661132 | 8.40E-05   | 0.00158027 |
| BMSK0009906 | 56    | 24    | 23    | 8    | 10   | 1    | 18.5261506 | 2.237963034 | 0.78108914 | 2.865182612 | 0.00416769 | 0.04137304 |
| BMSK0014799 | 33    | 69    | 31    | 9    | 8    | 10   | 26.7980581 | 2.214772735 | 0.66039933 | 3.353687121 | 0.00079742 | 0.01097271 |
| BMSK0012331 | 1676  | 939   | 1099  | 213  | 275  | 224  | 690.007178 | 2.205585364 | 0.19550341 | 11.28157004 | 1.62E-29   | 4.10E-27   |
| BMSK0014768 | 855   | 742   | 448   | 88   | 98   | 209  | 388.209233 | 2.202428162 | 0.3317654  | 6.638510754 | 3.17E-11   | 2.05E-09   |
| BMSK0009846 | 1020  | 598   | 629   | 179  | 214  | 50   | 419.304633 | 2.175133706 | 0.35068862 | 6.20246443  | 5.56E-10   | 3.05E-08   |
| BMSK0002347 | 1079  | 329   | 714   | 143  | 137  | 122  | 385.677017 | 2.167891553 | 0.29596764 | 7.324758759 | 2.39E-13   | 2.06E-11   |
| BMSK0013631 | 56    | 219   | 118   | 26   | 31   | 30   | 82.2744554 | 2.148858276 | 0.51465526 | 4.17533532  | 2.98E-05   | 0.00064786 |
| BMSK0005638 | 70    | 68    | 72    | 26   | 15   | 2    | 41.0542588 | 2.127447916 | 0.62770625 | 3.389241271 | 0.00070086 | 0.00983688 |
| BMSK0005148 | 86    | 72    | 30    | 19   | 20   | 0    | 35.7709026 | 2.114643578 | 0.73378254 | 2.881839578 | 0.00395361 | 0.03974957 |
| BMSK0002375 | 317   | 243   | 264   | 94   | 35   | 36   | 158.793067 | 2.108397305 | 0.39518667 | 5.335193393 | 9.54E-08   | 3.57E-06   |
| BMSK0005445 | 210   | 110   | 184   | 32   | 56   | 18   | 95.2689027 | 2.108129756 | 0.39476848 | 5.34016731  | 9.29E-08   | 3.49E-06   |
| BMSK0004257 | 51    | 39    | 23    | 2    | 17   | 6    | 21.4379781 | 2.08800091  | 0.73238303 | 2.850968444 | 0.00435863 | 0.04294917 |
| BMSK0000074 | 378   | 155   | 244   | 46   | 49   | 65   | 144.751975 | 2.066995907 | 0.32636433 | 6.333400244 | 2.40E-10   | 1.38E-08   |
| BMSK0004278 | 48    | 33    | 29    | 9    | 2    | 12   | 21.1608771 | 2.032566932 | 0.72506596 | 2.803285556 | 0.00505849 | 0.04772344 |
| BMSK0012731 | 168   | 144   | 286   | 38   | 54   | 44   | 118.925274 | 2.026014051 | 0.37134939 | 5.455816314 | 4.87E-08   | 1.94E-06   |
| BMSK0000897 | 75    | 32    | 18    | 7    | 8    | 11   | 22.8364584 | 2.02180526  | 0.68368911 | 2.957199731 | 0.00310447 | 0.03300941 |
| BMSK0016032 | 95    | 31    | 53    | 8    | 13   | 17   | 33.0424181 | 2.018339805 | 0.56838652 | 3.550998698 | 0.00038377 | 0.00603647 |
| BMSK0002516 | 5452  | 4145  | 4212  | 706  | 1147 | 1262 | 2688.432   | 2.005236775 | 0.20470268 | 9.795849975 | 1.17E-22   | 1.91E-20   |
| BMSK0001203 | 150   | 106   | 74    | 18   | 22   | 33   | 63.4419073 | 1.997790845 | 0.4312631  | 4.63241777  | 3.61E-06   | 9.73E-05   |
| BMSK0001456 | 3213  | 1799  | 2382  | 242  | 1038 | 453  | 1416.91585 | 1.994424322 | 0.30823713 | 6.470421997 | 9.77E-11   | 5.94E-09   |
| BMSK0001980 | 304   | 100   | 154   | 24   | 54   | 44   | 102.946734 | 1.991069029 | 0.38510655 | 5.170176966 | 2.34E-07   | 8.17E-06   |
| BMSK0009430 | 42    | 106   | 43    | 24   | 14   | 8    | 40.230816  | 1.964993437 | 0.62368528 | 3.150616984 | 0.00162926 | 0.01939592 |
| BMSK0011967 | 823   | 383   | 398   | 67   | 236  | 74   | 301.986964 | 1.955366226 | 0.35125052 | 5.56687068  | 2.59E-08   | 1.07E-06   |
| BMSK0001426 | 67    | 38    | 52    | 14   | 6    | 15   | 30.4302631 | 1.949654409 | 0.58797206 | 3.315896327 | 0.0009135  | 0.01221548 |
| BMSK0008784 | 78    | 54    | 46    | 9    | 31   | 4    | 34.5437415 | 1.924407834 | 0.61794097 | 3.114226022 | 0.00184428 | 0.02148835 |
| BMSK0015156 | 107   | 97    | 84    | 26   | 6    | 35   | 57.6089476 | 1.900824305 | 0.53861105 | 3.529122338 | 0.00041694 | 0.00640806 |
| BMSK0002496 | 85    | 35    | 21    | 6    | 17   | 10   | 26.1161307 | 1.89563968  | 0.65211019 | 2.906931541 | 0.00364993 | 0.0372926  |
| BMSK0014561 | 398   | 201   | 254   | 62   | 62   | 77   | 164.637903 | 1.883978737 | 0.29347164 | 6.419627883 | 1.37E-10   | 7.94E-09   |
| BMSK0011156 | 217   | 126   | 208   | 52   | 43   | 37   | 108.489128 | 1.881896185 | 0.3477554  | 5.411551261 | 6.25E-08   | 2.40E-06   |
| BMSK0015552 | 121   | 30    | 95    | 20   | 24   | 15   | 46.7876744 | 1.848697654 | 0.52005892 | 3.554785001 | 0.00037829 | 0.00596049 |
| BMSK0013542 | 114   | 76    | 52    | 24   | 14   | 20   | 47.3638868 | 1.848238087 | 0.48750244 | 3.791238662 | 0.0001499  | 0.00262479 |
| BMSK0012605 | 1106  | 708   | 830   | 185  | 286  | 192  | 521.459388 | 1.845361581 | 0.20503744 | 9.00012009  | 2.25E-19   | 2.94E-17   |
| BMSK0004472 | 51    | 52    | 54    | 16   | 14   | 10   | 32.0387473 | 1.837354333 | 0.54875124 | 3.348246327 | 0.00081325 | 0.01115677 |
| BMSK0005383 | 48    | 44    | 54    | 12   | 12   | 14   | 29.8240271 | 1.802649542 | 0.55699554 | 3.26380572  | 0.00121056 | 0.01527514 |
| BMSK0013274 | 404   | 1080  | 785   | 236  | 143  | 234  | 490.801955 | 1.800168513 | 0.62501259 | 2.880211618 | 0.00397408 | 0.03988511 |
| BMSK0000952 | 2668  | 1101  | 1909  | 407  | 556  | 484  | 1106.38614 | 1.77975558  | 0.22060213 | 8.067717084 | 7.16E-16   | 7.34E-14   |
| BMSK0011318 | 80    | 85    | 77    | 22   | 19   | 23   | 49.8593213 | 1.779474566 | 0.4540003  | 3.919544899 | 8.87E-05   | 0.00166535 |
| BMSK0008905 | 107   | 76    | 94    | 16   | 32   | 26   | 55.7385317 | 1.770973336 | 0.42245081 | 4.19214097  | 2.76E-05   | 0.00060747 |
| BMSK0014385 | 756   | 297   | 315   | 70   | 114  | 160  | 261.567999 | 1.767469921 | 0.3252452  | 5.434269115 | 5.50E-08   | 2.13E-06   |
| BMSK0001126 | 16158 | 10167 | 14436 | 2078 | 4136 | 4685 | 8181.62905 | 1.75934146  | 0.23746439 | 7.408864449 | 1.27E-13   | 1.11E-11   |
| BMSK0009199 | 85    | 49    | 62    | 25   | 18   | 8    | 39.0792256 | 1.747407644 | 0.53367259 | 3.274306551 | 0.00105922 | 0.01378492 |
| BMSK0014435 | 129   | 67    | 82    | 20   | 17   | 35   | 54.9673651 | 1.739862586 | 0.45587759 | 3.816512638 | 0.00013535 | 0.00241174 |
| BMSK0005710 | 270   | 77    | 90    | 14   | 53   | 47   | 82.1543531 | 1.720587065 | 0.47453012 | 3.625875352 | 0.00028798 | 0.00467488 |
| BMSK0015668 | 58    | 34    | 74    | 16   | 20   | 10   | 33.847669  | 1.710258217 | 0.55277431 | 3.093953861 | 0.00197508 | 0.02263652 |
| BMSK0014513 | 263   | 125   | 191   | 46   | 70   | 42   | 114.972709 | 1.702578363 | 0.32791374 | 5.192153129 | 2.08E-07   | 7.35E-06   |
| BMSK0000912 | 162   | 121   | 95    | 62   | 28   | 10   | 76.6083269 | 1.701692349 | 0.51695194 | 3.291780595 | 0.00099555 | 0.01312489 |
| BMSK0015217 | 1337  | 548   | 673   | 77   | 317  | 313  | 499.734838 | 1.682230468 | 0.35359561 | 4.757498235 | 1.96E-06   | 5.66E-05   |
| BMSK0015906 | 2795  | 608   | 1206  | 355  | 356  | 471  | 871.031499 | 1.681810432 | 0.31874955 | 5.27627544  | 1.32E-07   | 4.81E-06   |
| BMSK0001100 | 635   | 633   | 582   | 188  | 194  | 145  | 385.525717 | 1.678122241 | 0.24478239 | 6.855567555 | 7.10E-12   | 4.95E-10   |
| BMSK0009578 | 20453 | 23120 | 23242 | 4759 | 8500 | 6490 | 14085.0278 | 1.670464198 | 0.21574082 | 7.742921344 | 9.72E-15   | 9.23E-13   |
| BMSK0012604 | 88    | 58    | 62    | 15   | 38   | 8    | 42.1534082 | 1.659809926 | 0.53306347 | 3.113719123 | 0.00184745 | 0.02149785 |
| BMSK0013141 | 99    | 60    | 107   | 9    | 52   | 19   | 54.3393313 | 1.658114129 | 0.51991066 | 3.189228971 | 0.00142653 | 0.01753938 |
| BMSK0001681 | 2339  | 3560  | 2924  | 823  | 817  | 1001 | 1901.95205 | 1.63708805  | 0.26264671 | 6.233042308 | 4.57E-10   | 2.56E-08   |
| BMSK0013884 | 620   | 521   | 456   | 99   | 168  | 200  | 330.434205 | 1.636072731 | 0.2657714  | 6.155939719 | 7.46E-10   | 3.94E-08   |
| BMSK0013456 | 681   | 382   | 753   | 155  | 222  | 159  | 373.92501  | 1.613666511 | 0.26014193 | 6.203023521 | 5.54E-10   | 3.05E-08   |
| BMSK0002346 | 75    | 44    | 88    | 33   | 16   | 10   | 42.8901508 | 1.612369119 | 0.55449311 | 2.907825365 | 0.00363952 | 0.0372926  |
| BMSK0014578 | 503   | 176   | 457   | 97   | 128  | 103  | 228.589087 | 1.604756763 | 0.31516172 | 5.091851827 | 3.55E-07   | 1.18E-05   |
| BMSK0013403 | 425   | 84    | 206   | 59   | 84   | 56   | 137.335534 | 1.598216747 | 0.39658905 | 4.029906342 | 5.58E-05   | 0.00111947 |
| BMSK0001271 | 94    | 211   | 202   | 40   | 84   | 41   | 112.283759 | 1.597957218 | 0.43089887 | 3.708427511 | 0.00020855 | 0.00353644 |
| BMSK0015167 | 396   | 190   | 281   | 64   | 87   | 104  | 175.862377 | 1.577556167 | 0.29379264 | 5.369624448 | 7.89E-08   | 2.97E-06   |
| BMSK0011272 | 285   | 142   | 182   | 34   | 68   | 80   | 123.515618 | 1.565982632 | 0.34407639 | 4.551264356 | 5.33E-06   | 0.0001382  |
| BMSK0004081 | 245   | 223   | 190   | 61   | 37   | 99   | 138.833158 | 1.5619831   | 0.37793199 | 4.132974078 | 3.58E-05   | 0.00075799 |
| BMSK0014205 | 295   | 142   | 136   | 54   | 44   | 68   | 115.217595 | 1.558028857 | 0.35370749 | 4.404851195 | 1.06E-05   | 0.00025684 |
| BMSK0012607 | 778   | 326   | 330   | 188  | 130  | 92   | 285.459382 | 1.553930396 | 0.32651    | 4.75921224  | 1.94E-06   | 5.63E-05   |
| BMSK0011959 | 376   | 300   | 264   | 99   | 100  | 88   | 196.714079 | 1.551048757 | 0.26565474 | 5.838588608 | 5.26E-09   | 2.46E-07   |
| BMSK0014315 | 733   | 614   | 1137  | 223  | 312  | 251  | 530.865231 | 1.546375262 | 0.26808916 | 5.768137874 | 8.02E-09   | 3.58E-07   |
| BMSK0011031 | 1139  | 1088  | 956   | 452  | 168  | 330  | 676.056094 | 1.545708101 | 0.32783061 | 4.714959601 | 2.42E-06   | 6.79E-05   |
| BMSK0014387 | 402   | 374   | 297   | 111  | 113  | 110  | 227.380604 | 1.535824097 | 0.26484089 | 5.799044443 | 6.67E-09   | 3.04E-07   |
| BMSK0010380 | 829   | 764   | 1058  | 230  | 381  | 242  | 567.367132 | 1.534635055 | 0.24385062 | 6.293322255 | 3.11E-10   | 1.77E-08   |
| BMSK0007152 | 118   | 60    | 118   | 33   | 21   | 35   | 61.4789924 | 1.533033165 | 0.44362308 | 3.45571103  | 0.00054884 | 0.00796041 |
| BMSK0002376 | 4672  | 2807  | 4546  | 1083 | 1367 | 1274 | 2509       |             |            |             |            |            |

|             |        |        |        |        |       |        |            |             |            |             |            |            |
|-------------|--------|--------|--------|--------|-------|--------|------------|-------------|------------|-------------|------------|------------|
| BMSK0015064 | 1443   | 762    | 1542   | 251    | 650   | 348    | 788.336952 | 1.470877078 | 0.27926947 | 5.266873905 | 1.39E-07   | 5.00E-06   |
| BMSK0003029 | 238    | 128    | 123    | 38     | 78    | 43     | 100.809134 | 1.459657775 | 0.34973497 | 4.173611129 | 3.00E-05   | 0.00064968 |
| BMSK0014715 | 1784   | 832    | 1515   | 432    | 544   | 355    | 860.132135 | 1.458098827 | 0.23092032 | 6.314294027 | 2.71E-10   | 1.56E-08   |
| BMSK0014705 | 635    | 139    | 392    | 117    | 151   | 98     | 233.832317 | 1.439681013 | 0.35404274 | 4.066404587 | 4.77E-05   | 0.00098323 |
| BMSK0001007 | 94     | 98     | 103    | 45     | 35    | 19     | 64.5430834 | 1.435741087 | 0.44150026 | 3.251959754 | 0.00114612 | 0.0146649  |
| BMSK0014673 | 108    | 50     | 75     | 21     | 38    | 18     | 48.3253956 | 1.434710726 | 0.45707341 | 3.138906534 | 0.0016958  | 0.02001389 |
| BMSK0004631 | 110    | 131    | 136    | 27     | 64    | 42     | 83.1087994 | 1.428071552 | 0.39279228 | 3.635691507 | 0.00027724 | 0.00451647 |
| BMSK0005073 | 286    | 213    | 180    | 61     | 125   | 48     | 144.474231 | 1.416268969 | 0.3329595  | 4.253577249 | 2.10E-05   | 0.00047391 |
| BMSK0005300 | 396    | 178    | 239    | 75     | 115   | 80     | 168.647679 | 1.405544884 | 0.28689501 | 4.899161187 | 9.62E-07   | 2.96E-05   |
| BMSK0015437 | 687    | 341    | 335    | 158    | 134   | 149    | 282.635182 | 1.405016778 | 0.26982856 | 5.207072146 | 1.92E-07   | 6.81E-06   |
| BMSK0013018 | 88     | 92     | 132    | 45     | 38    | 25     | 69.074519  | 1.402597468 | 0.43010215 | 3.261079845 | 0.00110989 | 0.01428139 |
| BMSK0008342 | 899    | 392    | 454    | 255    | 184   | 128    | 361.194746 | 1.382092651 | 0.30236575 | 4.570929863 | 4.86E-06   | 0.00012729 |
| BMSK0001392 | 239    | 136    | 117    | 16     | 124   | 38     | 103.093291 | 1.377154045 | 0.48204341 | 2.85690874  | 0.00427789 | 0.04228296 |
| BMSK0013380 | 83     | 57     | 49     | 13     | 30    | 23     | 40.2637711 | 1.376026466 | 0.48466856 | 2.839108152 | 0.00452398 | 0.04442658 |
| BMSK0007275 | 216    | 83     | 120    | 43     | 71    | 28     | 86.498077  | 1.375100336 | 0.39766769 | 3.457913167 | 0.00054438 | 0.00793139 |
| BMSK0003781 | 854    | 599    | 750    | 224    | 296   | 246    | 475.236036 | 1.374859443 | 0.20335203 | 6.760982286 | 1.37E-11   | 9.26E-10   |
| BMSK0014463 | 517    | 366    | 334    | 150    | 130   | 135    | 261.144649 | 1.369745176 | 0.25331582 | 5.407262716 | 6.40E-08   | 2.44E-06   |
| BMSK0014062 | 363    | 265    | 218    | 86     | 111   | 102    | 182.536144 | 1.338949322 | 0.2681451  | 4.993376029 | 5.93E-07   | 1.89E-05   |
| BMSK0003597 | 107    | 61     | 140    | 26     | 28    | 55     | 67.240238  | 1.332756668 | 0.45903029 | 2.903417716 | 0.00369114 | 0.03762488 |
| BMSK0000710 | 243    | 51     | 196    | 32     | 84    | 56     | 101.53476  | 1.329487483 | 0.44885353 | 2.961962846 | 0.00305685 | 0.03257899 |
| BMSK0010591 | 2803   | 1528   | 1115   | 542    | 1037  | 367    | 1146.29635 | 1.324171981 | 0.29053494 | 4.55770303  | 5.17E-06   | 0.00013469 |
| BMSK0003260 | 196    | 82     | 90     | 46     | 54    | 28     | 76.8226545 | 1.312684781 | 0.39957322 | 3.28521713  | 0.00101904 | 0.01335731 |
| BMSK0014696 | 317    | 683    | 351    | 242    | 141   | 126    | 315.455358 | 1.302756727 | 0.38671505 | 3.368776926 | 0.00075503 | 0.01045234 |
| BMSK0000445 | 227    | 158    | 212    | 83     | 70    | 66     | 131.61394  | 1.27621484  | 0.30987517 | 4.118480462 | 3.81E-05   | 0.00080354 |
| BMSK0014464 | 691    | 709    | 522    | 255    | 241   | 223    | 430.60141  | 1.275293385 | 0.24736223 | 5.155570413 | 2.53E-07   | 8.80E-06   |
| BMSK0009406 | 198    | 129    | 87     | 36     | 71    | 47     | 89.2320775 | 1.270855721 | 0.37029889 | 3.431972851 | 0.00059921 | 0.00854152 |
| BMSK0013435 | 2706   | 2062   | 2036   | 807    | 937   | 796    | 1500.82127 | 1.266073698 | 0.17363109 | 7.291745471 | 3.06E-13   | 2.56E-11   |
| BMSK0013078 | 2406   | 1963   | 2817   | 798    | 954   | 973    | 1608.53875 | 1.262016198 | 0.20838565 | 6.056156812 | 1.39E-09   | 6.95E-08   |
| BMSK0007208 | 164    | 108    | 150    | 27     | 91    | 46     | 92.7289268 | 1.26186818  | 0.38915325 | 3.242599656 | 0.00118445 | 0.01501704 |
| BMSK0015957 | 107    | 65     | 72     | 34     | 39    | 18     | 53.1545614 | 1.254039402 | 0.43859031 | 2.859250132 | 0.00424644 | 0.04206625 |
| BMSK0014681 | 638    | 522    | 600    | 182    | 284   | 213    | 392.947393 | 1.247780875 | 0.22019657 | 5.666667977 | 1.46E-08   | 6.27E-07   |
| BMSK0010540 | 249    | 160    | 255    | 104    | 62    | 79     | 147.835808 | 1.24618807  | 0.33792639 | 3.687750107 | 0.00022625 | 0.00380118 |
| BMSK0015416 | 226864 | 280586 | 421709 | 133133 | 86412 | 137811 | 214500.43  | 1.244037469 | 0.29475554 | 4.220573592 | 2.44E-05   | 0.00053828 |
| BMSK0011693 | 2232   | 2250   | 2260   | 768    | 717   | 1092   | 1526.26786 | 1.243339296 | 0.23971643 | 5.186708782 | 2.14E-07   | 7.54E-06   |
| BMSK0015771 | 2979   | 2975   | 4412   | 1392   | 1401  | 1226   | 2362.69811 | 1.242962097 | 0.23858045 | 5.209823689 | 1.89E-07   | 6.74E-06   |
| BMSK0007523 | 234    | 97     | 80     | 48     | 61    | 40     | 86.2540071 | 1.241802745 | 0.3919396  | 3.168352366 | 0.00153306 | 0.01847565 |
| BMSK0009508 | 1610   | 980    | 1013   | 392    | 595   | 378    | 785.416446 | 1.240393087 | 0.19871086 | 6.242200688 | 4.31E-10   | 2.43E-08   |
| BMSK0009145 | 474    | 189    | 278    | 101    | 154   | 94     | 200.403821 | 1.239111724 | 0.2891781  | 4.284943174 | 1.83E-05   | 0.00042061 |
| BMSK0000481 | 4061   | 2991   | 4077   | 1295   | 1664  | 1317   | 2481.50957 | 1.238809448 | 0.18164394 | 6.819987931 | 9.10E-12   | 6.25E-10   |
| BMSK0010736 | 384    | 167    | 236    | 97     | 141   | 57     | 168.687441 | 1.235052549 | 0.32705742 | 3.776255986 | 0.0001592  | 0.00277178 |
| BMSK0006032 | 2291   | 1263   | 1481   | 455    | 860   | 604    | 1093.756   | 1.234817825 | 0.20352801 | 6.067065726 | 1.30E-09   | 6.57E-08   |
| BMSK0000078 | 206    | 103    | 115    | 53     | 51    | 53     | 91.5388476 | 1.226491854 | 0.34585075 | 3.546303893 | 0.00039068 | 0.00610846 |
| BMSK0014316 | 68     | 88     | 120    | 31     | 49    | 32     | 63.9882349 | 1.221144242 | 0.43557073 | 2.803549805 | 0.00505434 | 0.04772344 |
| BMSK0003840 | 625    | 282    | 283    | 155    | 155   | 133    | 254.972812 | 1.203408749 | 0.27542504 | 4.369278653 | 1.25E-05   | 0.00299771 |
| BMSK0001679 | 187    | 284    | 275    | 83     | 142   | 88     | 175.134038 | 1.188031779 | 0.3334415  | 3.562939153 | 0.00036673 | 0.0058185  |
| BMSK0008722 | 596    | 360    | 305    | 140    | 206   | 148    | 276.810282 | 1.180138958 | 0.24810007 | 4.756705376 | 1.97E-06   | 5.66E-05   |
| BMSK0008378 | 7262   | 2136   | 2631   | 1823   | 1419  | 1171   | 2522.05451 | 1.16302844  | 0.29387585 | 3.957550243 | 7.57E-05   | 0.00144522 |
| BMSK0008922 | 128    | 68     | 156    | 39     | 56    | 47     | 79.1424865 | 1.161625079 | 0.39239135 | 2.960373782 | 0.00307266 | 0.03270931 |
| BMSK0008395 | 397    | 318    | 338    | 108    | 178   | 148    | 239.264628 | 1.147554569 | 0.24632155 | 4.658766444 | 3.18E-06   | 8.72E-05   |
| BMSK0015478 | 344    | 308    | 254    | 146    | 98    | 121    | 207.31667  | 1.137149845 | 0.29785326 | 3.817819068 | 0.00013464 | 0.0024037  |
| BMSK0001032 | 212    | 141    | 151    | 74     | 57    | 71     | 113.564124 | 1.129416169 | 0.32397473 | 3.48612426  | 0.00049007 | 0.00738998 |
| BMSK0003439 | 150    | 194    | 163    | 103    | 46    | 59     | 119.467096 | 1.126771419 | 0.40378609 | 2.790515699 | 0.00526241 | 0.04934122 |
| BMSK0011094 | 1233   | 786    | 705    | 463    | 434   | 203    | 609.251734 | 1.121840619 | 0.2827158  | 3.968086034 | 7.25E-05   | 0.00139827 |
| BMSK0013799 | 272    | 158    | 84     | 46     | 112   | 54     | 112.679753 | 1.119947071 | 0.39622327 | 2.826555511 | 0.00470516 | 0.04545732 |
| BMSK0003596 | 274    | 176    | 186    | 83     | 88    | 88     | 143.089628 | 1.118918394 | 0.2821188  | 3.966124897 | 7.31E-05   | 0.00140599 |
| BMSK0014118 | 405    | 240    | 261    | 90     | 161   | 125    | 202.782409 | 1.111059363 | 0.26077465 | 4.260610999 | 2.04E-05   | 0.0006151  |
| BMSK0005860 | 417    | 269    | 344    | 164    | 126   | 130    | 233.673263 | 1.106998954 | 0.26952446 | 4.107229993 | 4.00E-05   | 0.00084174 |
| BMSK0006071 | 1730   | 1270   | 1749   | 604    | 548   | 814    | 1089.89403 | 1.104514635 | 0.23415555 | 4.717012335 | 2.39E-06   | 6.76E-05   |
| BMSK0010150 | 454    | 248    | 344    | 161    | 155   | 112    | 234.957402 | 1.102476194 | 0.26640706 | 4.138314408 | 3.50E-05   | 0.00074229 |
| BMSK0001817 | 196    | 101    | 84     | 48     | 62    | 45     | 83.9563239 | 1.10098602  | 0.36597646 | 3.008351984 | 0.00262669 | 0.02859082 |
| BMSK0013077 | 984    | 1056   | 1072   | 368    | 591   | 399    | 729.51206  | 1.098763913 | 0.22653226 | 4.850364056 | 1.23E-06   | 3.74E-05   |
| BMSK0014567 | 919    | 824    | 440    | 270    | 252   | 383    | 499.830143 | 1.098411667 | 0.28905712 | 3.799981395 | 0.00014471 | 0.0025535  |
| BMSK0009148 | 2512   | 1792   | 2302   | 748    | 1152  | 917    | 1513.73563 | 1.092291024 | 0.18174663 | 6.009965784 | 1.86E-09   | 9.15E-08   |
| BMSK0012982 | 492    | 461    | 482    | 175    | 198   | 239    | 334.06843  | 1.091021549 | 0.24721336 | 4.413279162 | 1.02E-05   | 0.00024836 |
| BMSK0002226 | 172    | 103    | 138    | 41     | 91    | 47     | 93.711769  | 1.075301015 | 0.35336596 | 3.043023757 | 0.00234214 | 0.02621196 |
| BMSK0012351 | 320    | 173    | 264    | 120    | 89    | 104    | 171.621928 | 1.073337614 | 0.30053868 | 3.571319273 | 0.00035511 | 0.00564396 |
| BMSK0014459 | 24102  | 17463  | 25148  | 5699   | 15175 | 8839   | 15422.3849 | 1.071851056 | 0.24116122 | 4.444541597 | 8.81E-06   | 0.0002177  |
| BMSK0014546 | 357    | 152    | 198    | 68     | 128   | 100    | 156.264501 | 1.071194239 | 0.30493051 | 3.512912591 | 0.00044322 | 0.00678444 |
| BMSK0007101 | 2336   | 1706   | 2034   | 809    | 969   | 828    | 1399.49562 | 1.069166073 | 0.17433871 | 6.1326945   | 8.64E-10   | 4.45E-08   |
| BMSK0010037 | 1711   | 1278   | 1021   | 726    | 510   | 443    | 918.564618 | 1.061513955 | 0.25430032 | 4.174253296 | 2.99E-05   | 0.00064939 |
| BMSK0006043 | 6195   | 4923   | 8292   | 3387   | 2173  | 2725   | 4549.1168  | 1.058002793 | 0.26389919 | 4.009117209 | 6.09E-05   | 0.00120872 |
| BMSK0000846 | 1951   | 1142   | 1171   | 559    | 608   | 630    | 964.202019 | 1.056245416 | 0.19385868 | 5.448532987 | 5.08E-08   | 2.01E-06   |
| BMSK0003546 | 905    | 349    | 504    | 157    | 270   | 308    | 388.386622 | 1.053505293 | 0.27999081 | 3.762642368 | 0.00016813 | 0.00289516 |
| BMSK0015674 | 294    | 222    | 181    | 119    | 61    | 111    | 160.352911 | 1.052724569 | 0.34496941 | 3.051646163 | 0.0022519  | 0.02560179 |
| BMSK0005702 | 891    | 932    | 1245   | 231    | 531   | 627    | 729.132205 | 1.052103588 | 0.30283411 | 3.474191193 | 0.0005124  | 0.00565071 |
| BMSK0010319 | 248    | 168    | 149    | 83     | 103   | 58     | 129.026405 | 1.048740832 | 0.31126663 | 3.369268433 | 0.00075368 | 0.01044958 |
| BMSK0014280 | 619    | 317    | 331    | 175    | 162   | 193    | 284.440258 | 1.044126002 | 0.25828119 | 4.042594042 | 5.29E-05   | 0.00107171 |
| BMSK0006832 | 1023   | 915    | 1013   | 492    | 315   | 474    | 694.859069 | 1.032120161 | 0.26142534 | 3.948049448 | 7.88E-05   | 0.0014944  |
| BMSK0001289 | 3668   | 3809   | 2277   | 1378   | 1437  | 1511   | 2298.34871 | 1.030106414 | 0.23135189 | 4.452552477 | 8.49E-06   | 0.00021097 |
| BMSK0010281 | 1145   | 890    | 1216   | 338    | 706   | 436    | 7          |             |            |             |            |            |

|             |        |        |       |        |        |        |            |              |            |             |            |            |
|-------------|--------|--------|-------|--------|--------|--------|------------|--------------|------------|-------------|------------|------------|
| BMSK0005741 | 1244   | 1175   | 1515  | 1823   | 3354   | 2266   | 1891.19086 | -1.01519197  | 0.22079278 | -4.59794007 | 4.27E-06   | 0.00011382 |
| BMSK0004181 | 810    | 383    | 252   | 511    | 1312   | 774    | 649.305907 | -1.021665252 | 0.30557039 | -3.34346946 | 0.00082738 | 0.01129966 |
| BMSK0012179 | 324    | 292    | 214   | 465    | 476    | 572    | 394.985424 | -1.024282725 | 0.24567341 | -4.16928603 | 3.06E-05   | 0.00066056 |
| BMSK0012173 | 1721   | 1077   | 1167  | 2139   | 2848   | 2216   | 1851.4675  | -1.026633959 | 0.16663338 | -6.16103413 | 7.23E-10   | 3.83E-08   |
| BMSK0000520 | 647    | 174    | 514   | 467    | 947    | 970    | 606.200439 | -1.029544752 | 0.32364725 | -3.18107058 | 0.00146732 | 0.01784847 |
| BMSK0007177 | 678    | 451    | 580   | 928    | 1279   | 963    | 810.816654 | -1.041094958 | 0.186329   | -5.58740151 | 2.30E-08   | 9.56E-07   |
| BMSK0012680 | 94988  | 66836  | 65161 | 65110  | 158048 | 200281 | 107431.359 | -1.041369752 | 0.27363173 | -3.8057346  | 0.00014138 | 0.0024997  |
| BMSK0004809 | 68     | 54     | 62    | 114    | 96     | 127    | 88.2904489 | -1.042455263 | 0.35499592 | -2.93652745 | 0.00331909 | 0.03484476 |
| BMSK0015226 | 691    | 454    | 429   | 979    | 1030   | 859    | 741.714934 | -1.044565467 | 0.19937065 | -5.23931408 | 1.61E-07   | 5.77E-06   |
| BMSK0000887 | 58     | 51     | 77    | 92     | 163    | 103    | 90.4308918 | -1.048911523 | 0.36169026 | -2.90002701 | 0.00373131 | 0.03789102 |
| BMSK0015800 | 1438   | 1267   | 1410  | 2193   | 2864   | 2717   | 1994.62877 | -1.049795333 | 0.18537022 | -5.66323617 | 1.49E-08   | 6.33E-07   |
| BMSK0009848 | 1302   | 884    | 922   | 1578   | 2366   | 1867   | 1477.96535 | -1.054197928 | 0.17131171 | -6.15368268 | 7.57E-10   | 3.97E-08   |
| BMSK0013199 | 82     | 56     | 60    | 144    | 98     | 118    | 94.6264604 | -1.058534803 | 0.35705158 | -2.96465516 | 0.00303022 | 0.03234118 |
| BMSK0008938 | 182234 | 75457  | 83140 | 194599 | 205006 | 207676 | 156622.507 | -1.065277667 | 0.21561762 | -4.94058735 | 7.79E-07   | 2.43E-05   |
| BMSK0008155 | 254    | 179    | 191   | 396    | 404    | 366    | 300.336712 | -1.071587977 | 0.22881361 | -4.68323521 | 2.82E-06   | 7.83E-05   |
| BMSK0011325 | 877    | 343    | 419   | 775    | 1527   | 734    | 754.957926 | -1.0719928   | 0.26605273 | -4.02924938 | 5.60E-05   | 0.00111947 |
| BMSK0002040 | 2057   | 1308   | 1167  | 2811   | 2836   | 2713   | 2154.77342 | -1.072841916 | 0.19004055 | -5.64533151 | 1.65E-08   | 7.00E-07   |
| BMSK0006627 | 213    | 94     | 73    | 110    | 258    | 326    | 174.794658 | -1.073092878 | 0.3783926  | -2.8359246  | 0.00456932 | 0.04477544 |
| BMSK0014775 | 480    | 264    | 206   | 606    | 562    | 556    | 445.568778 | -1.074433755 | 0.25269425 | -4.25191215 | 2.12E-05   | 0.00047618 |
| BMSK0001550 | 1125   | 736    | 803   | 1871   | 2319   | 865    | 1279.20811 | -1.078604279 | 0.26941258 | -4.0035409  | 6.24E-05   | 0.00122691 |
| BMSK0007228 | 629    | 385    | 485   | 674    | 1205   | 983    | 719.429104 | -1.080624391 | 0.20599367 | -5.24591055 | 1.56E-07   | 5.59E-06   |
| BMSK0013590 | 582    | 279    | 324   | 554    | 871    | 779    | 556.959085 | -1.081259469 | 0.22257808 | -4.85788829 | 1.19E-06   | 3.61E-05   |
| BMSK0013320 | 274    | 301    | 126   | 338    | 532    | 499    | 346.101644 | -1.087186843 | 0.30778809 | -3.53225769 | 0.00041203 | 0.00636028 |
| BMSK0011052 | 261    | 159    | 150   | 380    | 372    | 313    | 273.227324 | -1.092282669 | 0.24820223 | -4.40077699 | 1.08E-05   | 0.00025984 |
| BMSK0015277 | 720    | 427    | 419   | 764    | 1350   | 897    | 751.378091 | -1.099474976 | 0.20873155 | -5.26740638 | 1.38E-07   | 5.00E-06   |
| BMSK0001493 | 154    | 46     | 92    | 189    | 224    | 127    | 136.432762 | -1.103568226 | 0.35265455 | -3.12931802 | 0.00175213 | 0.02054581 |
| BMSK0008633 | 153    | 148    | 134   | 345    | 155    | 329    | 218.540595 | -1.11913505  | 0.35249463 | -3.17489953 | 0.00149888 | 0.01815978 |
| BMSK0005067 | 2685   | 2702   | 2699  | 4261   | 7179   | 5006   | 4092.16539 | -1.125342722 | 0.1986177  | -5.66587327 | 1.46E-08   | 6.27E-07   |
| BMSK0001435 | 102    | 72     | 56    | 142    | 154    | 149    | 112.958859 | -1.128205202 | 0.31520456 | -3.57927943 | 0.00034454 | 0.00548563 |
| BMSK0003863 | 3906   | 4623   | 4788  | 9355   | 9631   | 7909   | 6832.98357 | -1.129453039 | 0.22242148 | -5.07798538 | 3.81E-07   | 1.25E-05   |
| BMSK0004526 | 391    | 241    | 169   | 470    | 605    | 470    | 388.42324  | -1.130555182 | 0.24685229 | -4.57988539 | 4.65E-06   | 0.00012267 |
| BMSK0002189 | 1166   | 897    | 945   | 1155   | 2636   | 2278   | 1498.61495 | -1.132095381 | 0.230615   | -4.90902757 | 9.15E-07   | 2.82E-05   |
| BMSK0001494 | 214    | 155    | 136   | 240    | 405    | 359    | 250.078624 | -1.138599417 | 0.25116233 | -4.53332082 | 5.81E-06   | 0.00014838 |
| BMSK0008477 | 1311   | 498    | 879   | 1003   | 2710   | 1648   | 1300.53199 | -1.153795988 | 0.27235637 | -4.2363467  | 2.27E-05   | 0.00050552 |
| BMSK0015166 | 1255   | 978    | 1202  | 1930   | 2859   | 2211   | 1740.69311 | -1.158109601 | 0.18040222 | -6.41959725 | 1.37E-10   | 7.94E-09   |
| BMSK0004680 | 244    | 160    | 183   | 389    | 552    | 247    | 293.701405 | -1.16264628  | 0.27235274 | -4.26889879 | 1.96E-05   | 0.00044691 |
| BMSK0003810 | 2566   | 1970   | 1805  | 2823   | 5010   | 5088   | 3201.13486 | -1.166244593 | 0.20775297 | -5.61361225 | 1.98E-08   | 8.29E-07   |
| BMSK0010294 | 237    | 170    | 262   | 387    | 468    | 501    | 340.483264 | -1.167985951 | 0.24519484 | -4.76350127 | 1.90E-06   | 5.55E-05   |
| BMSK0008399 | 625    | 539    | 445   | 862    | 1309   | 1156   | 823.962107 | -1.18251269  | 0.20284238 | -5.82971226 | 5.55E-09   | 2.57E-07   |
| BMSK0005309 | 633    | 222    | 654   | 846    | 1134   | 1042   | 751.791947 | -1.182984919 | 0.28380457 | -4.1683082  | 3.07E-05   | 0.00066184 |
| BMSK0002729 | 404    | 300    | 244   | 602    | 772    | 566    | 481.531487 | -1.190031698 | 0.21436805 | -5.55134826 | 2.83E-08   | 1.16E-06   |
| BMSK0012277 | 2054   | 1176   | 1402  | 2716   | 3407   | 3253   | 2333.20364 | -1.19590108  | 0.1712819  | -6.98206342 | 2.91E-12   | 2.18E-10   |
| BMSK0003486 | 3380   | 1866   | 2210  | 4800   | 5715   | 4546   | 3746.63319 | -1.197549101 | 0.17127484 | -6.99197327 | 2.71E-12   | 2.04E-10   |
| BMSK0004014 | 178    | 140    | 125   | 273    | 445    | 214    | 227.414407 | -1.200503772 | 0.27793615 | -4.31935095 | 1.56E-05   | 0.00036513 |
| BMSK0001869 | 5378   | 4202   | 3606  | 4664   | 12535  | 10780  | 6773.54687 | -1.202334555 | 0.2502313  | -4.80489279 | 1.55E-06   | 4.65E-05   |
| BMSK0014443 | 70     | 54     | 33    | 111    | 118    | 92     | 80.1106429 | -1.203233946 | 0.37377161 | -3.21916894 | 0.00128563 | 0.01602292 |
| BMSK0013797 | 55     | 34     | 28    | 70     | 87     | 81     | 59.0780606 | -1.204108877 | 0.39971887 | -3.01238939 | 0.002592   | 0.02838752 |
| BMSK0005620 | 497    | 114    | 160   | 505    | 562    | 403    | 365.146799 | -1.207731484 | 0.33616236 | -3.59270288 | 0.00032727 | 0.00523797 |
| BMSK0002017 | 5717   | 6097   | 5408  | 14644  | 12340  | 9160   | 9099.27598 | -1.210282538 | 0.23501091 | -5.14989929 | 2.61E-07   | 9.04E-06   |
| BMSK0002823 | 72     | 44     | 42    | 84     | 96     | 142    | 80.416184  | -1.215306477 | 0.37812964 | -3.21399419 | 0.00130902 | 0.01627005 |
| BMSK0001554 | 173849 | 113480 | 81926 | 262170 | 257099 | 229929 | 187382.949 | -1.215501607 | 0.20888136 | -5.81910054 | 5.92E-09   | 2.73E-07   |
| BMSK0014763 | 290    | 182    | 190   | 368    | 607    | 412    | 338.393787 | -1.218820196 | 0.22573765 | -5.39927747 | 6.69E-08   | 2.54E-06   |
| BMSK0009242 | 230    | 91     | 118   | 135    | 487    | 297    | 217.89436  | -1.221602849 | 0.3520575  | -3.4608958  | 0.00052066 | 0.00769852 |
| BMSK0005074 | 191    | 161    | 222   | 321    | 564    | 358    | 302.198196 | -1.223204787 | 0.25739348 | -4.75227564 | 2.01E-06   | 5.77E-05   |
| BMSK0002664 | 107    | 112    | 114   | 196    | 356    | 182    | 177.408368 | -1.232299925 | 0.30357748 | -4.05926002 | 4.92E-05   | 0.00100248 |
| BMSK0015260 | 313    | 168    | 277   | 532    | 570    | 485    | 392.891127 | -1.243460256 | 0.23380419 | -5.31838315 | 1.05E-07   | 3.87E-06   |
| BMSK0001552 | 2794   | 1696   | 1643  | 4168   | 5527   | 3324   | 3176.12758 | -1.255181062 | 0.19417079 | -6.46431448 | 1.02E-10   | 6.12E-09   |
| BMSK0007720 | 126    | 128    | 35    | 226    | 184    | 202    | 153.181878 | -1.255875987 | 0.40205184 | -3.12366679 | 0.00178613 | 0.0208908  |
| BMSK0001159 | 164    | 126    | 146   | 184    | 462    | 320    | 230.750048 | -1.255968143 | 0.28825204 | -4.35718733 | 1.32E-05   | 0.000313   |
| BMSK0006532 | 1441   | 496    | 782   | 1652   | 2472   | 1518   | 1368.10704 | -1.259439398 | 0.24295228 | -5.18389615 | 2.17E-07   | 7.62E-06   |
| BMSK0015759 | 75     | 38     | 28    | 79     | 123    | 96     | 72.1562692 | -1.269159595 | 0.39174265 | -3.23977895 | 0.00119622 | 0.01511517 |
| BMSK0004707 | 491    | 395    | 482   | 786    | 1107   | 1115   | 734.400293 | -1.273345724 | 0.20736341 | -6.14064795 | 8.22E-10   | 4.26E-08   |
| BMSK0001742 | 96     | 46     | 20    | 118    | 102    | 110    | 81.9066631 | -1.273741085 | 0.43932917 | -2.89928637 | 0.00374013 | 0.03791246 |
| BMSK0013202 | 77     | 138    | 46    | 261    | 217    | 110    | 146.034673 | -1.276319672 | 0.4375113  | -2.91722674 | 0.00353159 | 0.03642785 |
| BMSK0016035 | 360    | 141    | 201   | 585    | 433    | 426    | 360.31662  | -1.282086338 | 0.28264033 | -4.53610552 | 5.73E-06   | 0.00014685 |
| BMSK0009297 | 3139   | 2198   | 1657  | 4195   | 6509   | 4605   | 3696.15239 | -1.28455934  | 0.19573968 | -6.5625903  | 5.29E-11   | 3.33E-09   |
| BMSK0014323 | 425    | 355    | 387   | 635    | 1063   | 923    | 632.306802 | -1.292402843 | 0.21111903 | -6.12167853 | 9.26E-10   | 4.75E-08   |
| BMSK0003961 | 114    | 43     | 44    | 155    | 168    | 100    | 102.954099 | -1.300828015 | 0.37471827 | -3.4714828  | 0.00051759 | 0.00768358 |
| BMSK0000579 | 848    | 667    | 428   | 1538   | 1392   | 1308   | 1044.45389 | -1.305561375 | 0.23544463 | -5.5450888  | 2.94E-08   | 1.20E-06   |
| BMSK0011643 | 328    | 190    | 159   | 548    | 443    | 456    | 357.947318 | -1.309655495 | 0.26171171 | -5.00419148 | 5.61E-07   | 1.80E-05   |
| BMSK0005850 | 24     | 29     | 38    | 78     | 62     | 71     | 51.9843337 | -1.348210407 | 0.46050363 | -2.92768683 | 0.00341494 | 0.03560512 |
| BMSK0001219 | 290    | 102    | 116   | 349    | 489    | 278    | 265.826696 | -1.353605251 | 0.30138903 | -4.49122262 | 7.08E-06   | 0.00017847 |
| BMSK0013883 | 72     | 55     | 64    | 160    | 170    | 110    | 106.338117 | -1.357334827 | 0.33143471 | -4.09533096 | 4.22E-05   | 0.00088008 |
| BMSK0011449 | 84     | 45     | 76    | 176    | 207    | 92     | 113.449392 | -1.374852965 | 0.36346885 | -3.78258815 | 0.00015521 | 0.00270735 |
| BMSK0014631 | 1930   | 836    | 1173  | 2249   | 3048   | 3806   | 2170.67285 | -1.413481518 | 0.22912314 | -6.16909103 | 6.87E-10   | 3.66E-08   |
| BMSK0007001 | 340    | 228    | 176   | 605    | 486    | 637    | 419.33745  | -1.418138501 | 0.25844369 | -5.48722424 | 4.08E-08   | 1.64E-06   |
| BMSK0005880 | 242    | 165    | 129   | 147    | 760    | 445    | 304.642315 | -1.434617522 | 0.37137515 | -3.86298741 | 0.00011201 | 0.00203557 |
| BMSK0000777 | 200    | 77     | 100   | 246    | 333    | 303    | 208.26155  | -1.435898192 | 0.28209819 | -5.09006531 | 3.58E-07   | 1.19E-05   |
| BMSK0006453 | 727    | 465    | 445   | 1460   | 1262   | 1171   | 935.650217 | -1.444350811 | 0.21405484 | -6.7475736  | 1.50E-11   |            |

|             |        |       |        |        |        |        |            |              |            |              |            |            |
|-------------|--------|-------|--------|--------|--------|--------|------------|--------------|------------|--------------|------------|------------|
| BMSK0008951 | 47     | 24    | 9      | 70     | 68     | 60     | 46.4377616 | -1.53847147  | 0.51624773 | -2.98010315  | 0.00288151 | 0.03103665 |
| BMSK0001826 | 864    | 451   | 555    | 1882   | 1417   | 1389   | 1113.45209 | -1.542800297 | 0.23186747 | -6.65380233  | 2.86E-11   | 1.86E-09   |
| BMSK0009915 | 126    | 92    | 28     | 298    | 156    | 160    | 147.726079 | -1.55640778  | 0.43841683 | -3.55006398  | 0.00038514 | 0.00604752 |
| BMSK0001888 | 280    | 162   | 242    | 616    | 633    | 548    | 418.940927 | -1.570059983 | 0.22654358 | -6.93049865  | 4.19E-12   | 3.06E-10   |
| BMSK0011176 | 72     | 46    | 39     | 121    | 176    | 127    | 96.8067871 | -1.596629787 | 0.33301569 | -4.7944581   | 1.63E-06   | 4.83E-05   |
| BMSK0008358 | 84     | 155   | 94     | 229    | 453    | 292    | 219.80393  | -1.598129802 | 0.34120928 | -4.68372316  | 2.82E-06   | 7.83E-05   |
| BMSK0003984 | 244    | 96    | 118    | 306    | 624    | 304    | 275.772018 | -1.606828475 | 0.29793775 | -5.39316841  | 6.92E-08   | 2.62E-06   |
| BMSK0004407 | 25     | 11    | 14     | 34     | 54     | 47     | 30.6621538 | -1.615747444 | 0.53898229 | -2.99777467  | 0.00271959 | 0.02939667 |
| BMSK0011175 | 24     | 16    | 12     | 39     | 41     | 60     | 32.4851102 | -1.61736361  | 0.53992545 | -2.99553137  | 0.00273967 | 0.02957872 |
| BMSK0016013 | 2011   | 2717  | 2961   | 8864   | 5852   | 6866   | 5089.3294  | -1.620787481 | 0.2755089  | -5.88288602  | 4.03E-09   | 1.92E-07   |
| BMSK0003816 | 41     | 36    | 18     | 82     | 100    | 82     | 60.4913582 | -1.630707398 | 0.42255491 | -3.85916088  | 0.00011378 | 0.0020595  |
| BMSK0012738 | 26     | 12    | 12     | 32     | 48     | 58     | 31.3186667 | -1.66107501  | 0.55022848 | -3.01888227  | 0.00253709 | 0.02795396 |
| BMSK0014965 | 41     | 28    | 18     | 77     | 99     | 69     | 55.558404  | -1.663482412 | 0.42718228 | -3.89408104  | 9.86E-05   | 0.00182038 |
| BMSK0009951 | 360    | 302   | 274    | 815    | 1441   | 514    | 613.932386 | -1.673513759 | 0.27766136 | -6.02717553  | 1.67E-09   | 8.27E-08   |
| BMSK0007755 | 15     | 13    | 20     | 32     | 43     | 65     | 31.9751941 | -1.682251322 | 0.56103146 | -2.9984973   | 0.00271315 | 0.02936184 |
| BMSK0014368 | 30     | 25    | 20     | 70     | 107    | 46     | 49.671061  | -1.701148043 | 0.46196675 | -3.68240365  | 0.00023105 | 0.00385343 |
| BMSK0002415 | 59     | 46    | 38     | 151    | 150    | 114    | 94.6553447 | -1.704106759 | 0.34601002 | -4.92502135  | 8.44E-07   | 2.61E-05   |
| BMSK0005827 | 2767   | 1854  | 1600   | 5542   | 6333   | 6182   | 4096.37833 | -1.715270836 | 0.17926448 | -9.5683808   | 1.09E-21   | 1.71E-19   |
| BMSK0008347 | 414    | 333   | 363    | 907    | 1467   | 991    | 748.720469 | -1.725348794 | 0.20006791 | -3.894081567 | 6.48E-18   | 7.29E-16   |
| BMSK0002578 | 1541   | 926   | 1132   | 1605   | 3643   | 5484   | 2395.74024 | -1.735487217 | 0.29718336 | -5.83978591  | 5.23E-09   | 2.46E-07   |
| BMSK0013201 | 24     | 12    | 9      | 57     | 42     | 29     | 29.3563256 | -1.735976749 | 0.59154582 | -2.93464458  | 0.0033393  | 0.03489625 |
| BMSK0011447 | 42     | 29    | 7      | 88     | 89     | 51     | 51.4496642 | -1.746866885 | 0.5338829  | -3.27200382  | 0.00106788 | 0.01387789 |
| BMSK0002364 | 24     | 24    | 4      | 46     | 40     | 68     | 35.2717059 | -1.74787535  | 0.61792671 | -2.8286127   | 0.00467502 | 0.04542092 |
| BMSK0013184 | 34     | 6     | 10     | 50     | 46     | 44     | 31.5876417 | -1.77017554  | 0.60120414 | -2.94438349  | 0.00323599 | 0.03408997 |
| BMSK0001142 | 47     | 53    | 58     | 166    | 210    | 135    | 113.481496 | -1.806104795 | 0.3387824  | -5.33116473  | 9.76E-08   | 3.63E-06   |
| BMSK0014193 | 121688 | 62097 | 126112 | 250157 | 534251 | 222551 | 216625.931 | -1.819848631 | 0.2631325  | -6.91609223  | 4.64E-12   | 3.31E-10   |
| BMSK0006512 | 153    | 106   | 59     | 338    | 263    | 372    | 220.731681 | -1.822439421 | 0.32145536 | -5.669339    | 1.43E-08   | 6.23E-07   |
| BMSK0009657 | 82     | 29    | 41     | 147    | 239    | 87     | 102.604963 | -1.824518336 | 0.39854346 | -4.57796579  | 4.70E-06   | 0.00012344 |
| BMSK0013326 | 30     | 8     | 5      | 41     | 52     | 36     | 28.3222423 | -1.844820847 | 0.63223722 | -2.91792508  | 0.00352369 | 0.03640614 |
| BMSK0004449 | 46     | 14    | 16     | 52     | 93     | 91     | 51.4242809 | -1.854943813 | 0.47965986 | -3.86720671  | 0.00011009 | 0.00200468 |
| BMSK0002808 | 55     | 30    | 32     | 192    | 76     | 88     | 82.4734165 | -1.855586321 | 0.456965   | -4.06067495  | 4.89E-05   | 0.00100089 |
| BMSK0006531 | 416    | 112   | 258    | 718    | 1028   | 710    | 537.547004 | -1.858051167 | 0.28526918 | -6.51332602  | 7.35E-11   | 4.53E-09   |
| BMSK0012752 | 14     | 10    | 6      | 32     | 22     | 42     | 21.6813942 | -1.885493713 | 0.66966347 | -2.81558393  | 0.00486887 | 0.04659934 |
| BMSK0008711 | 25     | 65    | 51     | 72     | 253    | 194    | 110.405368 | -1.889152969 | 0.46514873 | -4.06139553  | 4.88E-05   | 0.00100005 |
| BMSK0013129 | 12     | 20    | 10     | 44     | 49     | 51     | 31.9487225 | -1.88923371  | 0.56456822 | -3.3463338   | 0.00081888 | 0.01121715 |
| BMSK0005351 | 537    | 170   | 178    | 741    | 1246   | 826    | 607.89374  | -1.896689609 | 0.28978878 | -6.54507618  | 5.95E-11   | 3.72E-09   |
| BMSK0008004 | 24     | 10    | 15     | 79     | 48     | 29     | 35.1938107 | -1.904627745 | 0.57859249 | -3.29182933  | 0.00099538 | 0.01312489 |
| BMSK0006798 | 144    | 45    | 79     | 203    | 429    | 254    | 189.020062 | -1.909780465 | 0.32686643 | -5.84269374  | 5.14E-09   | 2.43E-07   |
| BMSK0011494 | 7244   | 4600  | 4386   | 22609  | 18794  | 11828  | 11844.9504 | -1.909818255 | 0.23883453 | -7.99640757  | 1.28E-15   | 1.27E-13   |
| BMSK0012556 | 50     | 20    | 13     | 104    | 111    | 54     | 58.757471  | -1.92721292  | 0.48569589 | -3.96794157  | 7.25E-05   | 0.00139827 |
| BMSK0009850 | 149    | 52    | 96     | 282    | 388    | 331    | 216.897937 | -1.95259824  | 0.28608373 | -6.82526834  | 8.78E-12   | 6.07E-10   |
| BMSK0009146 | 100    | 28    | 54     | 170    | 197    | 235    | 131.591707 | -1.958240902 | 0.35353996 | -5.53895214  | 3.04E-08   | 1.23E-06   |
| BMSK0000966 | 2      | 25    | 27     | 67     | 82     | 59     | 45.3437524 | -1.960972796 | 0.64562727 | -3.03731408  | 0.00238697 | 0.0265623  |
| BMSK0015697 | 32     | 27    | 34     | 137    | 110    | 77     | 71.7446755 | -1.962251211 | 0.41372628 | -4.74287298  | 2.11E-06   | 6.01E-05   |
| BMSK0002398 | 15     | 7     | 15     | 37     | 37     | 53     | 27.9583502 | -1.964831776 | 0.58836561 | -3.33947422  | 0.00083937 | 0.0114122  |
| BMSK0009375 | 156    | 113   | 197    | 622    | 324    | 653    | 360.579063 | -1.968881199 | 0.33152073 | -5.93893847  | 2.87E-09   | 1.39E-07   |
| BMSK0015956 | 46     | 22    | 18     | 130    | 79     | 77     | 63.8796627 | -1.978262222 | 0.45609398 | -4.33740041  | 1.44E-05   | 0.000339   |
| BMSK0005642 | 22     | 18    | 8      | 49     | 67     | 54     | 36.705955  | -1.983342981 | 0.5234025  | -3.78932652  | 0.00015106 | 0.00264001 |
| BMSK0002960 | 87     | 64    | 95     | 458    | 191    | 198    | 192.259684 | -1.992035768 | 0.38852817 | -5.12713344  | 2.94E-07   | 1.01E-05   |
| BMSK0002846 | 5483   | 5935  | 4346   | 28176  | 13949  | 13370  | 12503.6002 | -1.994215835 | 0.52315413 | -3.81190882  | 0.0001379  | 0.00244755 |
| BMSK0005405 | 6      | 16    | 6      | 27     | 48     | 33     | 23.0894865 | -1.999038378 | 0.68182022 | -2.93191419  | 0.0033688  | 0.03516424 |
| BMSK0003534 | 22     | 16    | 6      | 54     | 67     | 36     | 33.7525537 | -2.007349932 | 0.56862402 | -3.53018842  | 0.00041526 | 0.00639941 |
| BMSK0009441 | 2055   | 1802  | 1209   | 5370   | 7735   | 5565   | 3997.88133 | -2.017550447 | 0.20369219 | -9.9048982   | 3.96E-23   | 7.09E-21   |
| BMSK0007465 | 245    | 143   | 179    | 530    | 904    | 637    | 440.216187 | -2.02002505  | 0.2193682  | -9.20837685  | 3.31E-20   | 4.58E-18   |
| BMSK0002020 | 420    | 352   | 271    | 1709   | 1232   | 859    | 835.505586 | -2.046303305 | 0.27584943 | -7.41818937  | 1.19E-13   | 1.04E-11   |
| BMSK0002787 | 248    | 118   | 140    | 390    | 506    | 916    | 392.486645 | -2.04883476  | 0.30932847 | -6.6234923   | 3.51E-11   | 2.25E-09   |
| BMSK0008094 | 62     | 12    | 9      | 83     | 79     | 114    | 59.9707182 | -2.050333715 | 0.54335204 | -3.77349043  | 0.00016098 | 0.00279204 |
| BMSK0006626 | 25     | 21    | 11     | 65     | 57     | 87     | 45.6843152 | -2.058144412 | 0.49456921 | -4.16148915  | 3.16E-05   | 0.00067771 |
| BMSK0010102 | 25     | 35    | 18     | 91     | 98     | 110    | 64.7859602 | -2.064822194 | 0.43236246 | -4.77567405  | 1.79E-06   | 5.24E-05   |
| BMSK0004547 | 106    | 56    | 42     | 389    | 139    | 183    | 160.305648 | -2.075203313 | 0.42109451 | -4.92811776  | 8.30E-07   | 2.59E-05   |
| BMSK0007633 | 12     | 20    | 18     | 80     | 21     | 87     | 42.5902412 | -2.077530335 | 0.61846983 | -3.35914579  | 0.00078184 | 0.01079079 |
| BMSK0002387 | 52     | 26    | 12     | 202    | 68     | 40     | 70.1591045 | -2.083656621 | 0.58967343 | -3.53357725  | 0.00040998 | 0.00633934 |
| BMSK0014037 | 104    | 110   | 57     | 327    | 436    | 315    | 228.542464 | -2.121271989 | 0.29438064 | -7.20588155  | 5.77E-13   | 4.66E-11   |
| BMSK0013080 | 28     | 4     | 11     | 38     | 60     | 62     | 33.6132107 | -2.144412727 | 0.5951612  | -3.60307883  | 0.00031447 | 0.00505981 |
| BMSK0009151 | 69     | 40    | 40     | 212    | 199    | 182    | 126.590081 | -2.186576072 | 0.31647724 | -6.9091101   | 4.88E-12   | 3.45E-10   |
| BMSK0013427 | 43     | 9     | 17     | 82     | 114    | 82     | 57.6919093 | -2.245227925 | 0.47005242 | -4.77654796  | 1.78E-06   | 5.23E-05   |
| BMSK0007210 | 3899   | 6494  | 4201   | 20603  | 23342  | 21484  | 13764.6844 | -2.251449599 | 0.25920871 | -8.6858564   | 3.76E-18   | 4.29E-16   |
| BMSK0005375 | 20     | 44    | 10     | 54     | 126    | 161    | 70.5796798 | -2.263758609 | 0.54183931 | -4.17791506  | 2.94E-05   | 0.00064209 |
| BMSK0003392 | 472    | 400   | 365    | 1610   | 2465   | 1410   | 1130.67723 | -2.273283353 | 0.20808007 | -10.9250413  | 8.75E-28   | 1.95E-25   |
| BMSK0013626 | 18     | 6     | 10     | 44     | 52     | 48     | 30.0291426 | -2.28955792  | 0.56808618 | -4.03030035  | 5.57E-05   | 0.00111947 |
| BMSK0004756 | 260    | 124   | 286    | 517    | 1268   | 1221   | 613.191583 | -2.302507194 | 0.30544699 | -7.53815633  | 4.77E-14   | 4.31E-12   |
| BMSK0004884 | 13     | 11    | 6      | 35     | 42     | 57     | 28.0112445 | -2.32672907  | 0.59941753 | -3.88165003  | 0.00010375 | 0.00190063 |
| BMSK0010931 | 64     | 10    | 32     | 113    | 180    | 164    | 93.6625751 | -2.344401231 | 0.4320825  | -5.4258185   | 5.77E-08   | 2.22E-06   |
| BMSK0011062 | 8      | 2     | 17     | 55     | 19     | 45     | 25.886398  | -2.356189063 | 0.74782259 | -3.15073267  | 0.00162861 | 0.01939592 |
| BMSK0004115 | 892    | 696   | 474    | 2418   | 3415   | 3772   | 1979.73767 | -2.378395362 | 0.2222321  | -10.7023036  | 9.93E-27   | 2.11E-24   |
| BMSK0001549 | 61     | 42    | 64     | 237    | 263    | 278    | 161.664945 | -2.378699609 | 0.2947844  | -8.06928602  | 7.07E-16   | 7.33E-14   |
| BMSK0002842 | 10     | 6     | 11     | 37     | 46     | 43     | 26.032887  | -2.378778442 | 0.60224867 | -3.94982763  | 7.82E-05   | 0.00148643 |
| BMSK0007774 | 14     | 10    | 12     | 54     | 76     | 40     | 34.7167854 | -2.380143268 | 0.53483656 | -4.45022542  | 8.58E-06   | 0.00021266 |
| BMSK0007077 | 14     | 6     | 4      | 16     | 64     | 35     | 22.5143649 | -2.411864048 | 0.70920275 | -3.40081036  | 0.00067186 | 0.00950297 |
| BMSK0009881 | 17     | 7     | 8      | 61     | 20     | 61     | 30.6157824 | -2.421115737 | 0.65184176 | -3.71426913  | 0.00020379 | 0.00346864 |
| BMSK0009563 | 20     | 0     | 10     | 16     | 72     | 50     | 27.0516093 | -2.42135504  | 0.78441109 | -3.08684446  | 0.00202293 | 0.02306904 |
| BMSK00090   |        |       |        |        |        |        |            |              |            |              |            |            |

|             |      |      |      |      |       |       |            |              |            |             |            |            |
|-------------|------|------|------|------|-------|-------|------------|--------------|------------|-------------|------------|------------|
| BMSK0004541 | 12   | 4    | 1    | 21   | 19    | 41    | 16.7072148 | -2.529664661 | 0.8402326  | -3.0106719  | 0.0026067  | 0.02848019 |
| BMSK0010165 | 112  | 86   | 127  | 333  | 766   | 650   | 347.500967 | -2.538113159 | 0.28455884 | -8.91946685 | 4.69E-19   | 5.94E-17   |
| BMSK0005042 | 3    | 4    | 12   | 32   | 57    | 18    | 21.1441911 | -2.553881855 | 0.76336929 | -3.34553915 | 0.00082123 | 0.01123247 |
| BMSK0005833 | 4    | 0    | 12   | 16   | 56    | 18    | 17.2535387 | -2.559402188 | 0.91807345 | -2.78779675 | 0.00530678 | 0.0494606  |
| BMSK0010417 | 146  | 84   | 65   | 541  | 449   | 525   | 311.779038 | -2.574843681 | 0.27699375 | -9.2956744  | 1.46E-20   | 2.09E-18   |
| BMSK0013866 | 87   | 68   | 75   | 465  | 384   | 371   | 250.926435 | -2.579883647 | 0.2727277  | -9.45955852 | 3.09E-21   | 4.70E-19   |
| BMSK0013357 | 139  | 46   | 65   | 416  | 235   | 612   | 263.00775  | -2.611892414 | 0.37483088 | -6.96818896 | 3.21E-12   | 2.38E-10   |
| BMSK0000961 | 0    | 17   | 2    | 40   | 24    | 51    | 24.0276536 | -2.612337483 | 0.9080613  | -2.87682945 | 0.00401693 | 0.04022659 |
| BMSK0005040 | 22   | 6    | 10   | 74   | 52    | 69    | 40.1598923 | -2.613252922 | 0.54403878 | -4.80343136 | 1.56E-06   | 4.65E-05   |
| BMSK0011406 | 4    | 2    | 4    | 16   | 28    | 12    | 11.0122833 | -2.620187537 | 0.925702   | -2.83048706 | 0.00464772 | 0.04520378 |
| BMSK0007066 | 32   | 12   | 14   | 113  | 113   | 82    | 62.2779701 | -2.626244406 | 0.44068637 | -5.95944099 | 2.53E-09   | 1.24E-07   |
| BMSK0013952 | 7    | 4    | 7    | 29   | 43    | 31    | 20.4534673 | -2.664745638 | 0.68484438 | -3.8910236  | 9.98E-05   | 0.00183975 |
| BMSK0011266 | 6    | 8    | 0    | 14   | 34    | 35    | 16.3285406 | -2.680815794 | 0.88374719 | -3.03346456 | 0.00241763 | 0.02683218 |
| BMSK0003084 | 24   | 17   | 21   | 20   | 235   | 128   | 71.70443   | -2.688661182 | 0.57903556 | -4.64334382 | 3.43E-06   | 9.34E-05   |
| BMSK0011471 | 12   | 2    | 4    | 27   | 53    | 22    | 19.6998296 | -2.710677132 | 0.75345432 | -3.59766618 | 0.00032109 | 0.00514809 |
| BMSK0009905 | 21   | 4    | 10   | 92   | 50    | 47    | 38.9421147 | -2.713872262 | 0.59550222 | -4.55728317 | 5.18E-06   | 0.00013469 |
| BMSK0004409 | 35   | 4    | 24   | 112  | 129   | 113   | 70.612837  | -2.723592664 | 0.47908729 | -5.68496123 | 1.31E-08   | 5.71E-07   |
| BMSK0009286 | 18   | 14   | 2    | 58   | 95    | 52    | 40.0560601 | -2.750751937 | 0.5886145  | -4.67326568 | 2.96E-06   | 8.17E-05   |
| BMSK0009241 | 106  | 97   | 152  | 306  | 1462  | 587   | 440.619356 | -2.763022819 | 0.59578693 | -4.6376023  | 3.52E-06   | 9.53E-05   |
| BMSK0014792 | 0    | 6    | 4    | 34   | 24    | 9     | 13.632294  | -2.795308794 | 1.00002542 | -2.79523774 | 0.00518616 | 0.0487766  |
| BMSK0013721 | 6    | 14   | 2    | 66   | 34    | 40    | 28.8340098 | -2.808561892 | 0.71088973 | -3.9507701  | 7.79E-05   | 0.00148368 |
| BMSK0009397 | 218  | 136  | 92   | 805  | 1042  | 916   | 545.410912 | -2.813778808 | 0.23885224 | -11.7804163 | 4.92E-32   | 1.45E-29   |
| BMSK0013101 | 2    | 0    | 8    | 10   | 28    | 28    | 12.7593747 | -2.822009387 | 1.00877541 | -2.79746051 | 0.00515061 | 0.04849224 |
| BMSK0016011 | 6    | 4    | 0    | 16   | 29    | 19    | 12.3650133 | -2.852879041 | 0.9502043  | -3.00238491 | 0.00267873 | 0.02905835 |
| BMSK0004821 | 30   | 23   | 27   | 240  | 174   | 104   | 104.14643  | -2.873570606 | 0.40719737 | -7.05694791 | 1.70E-12   | 1.31E-10   |
| BMSK0004544 | 20   | 4    | 0    | 38   | 33    | 69    | 27.9799384 | -2.87890711  | 0.78645286 | -3.66062258 | 0.0002516  | 0.00412837 |
| BMSK0010293 | 19   | 17   | 9    | 99   | 84    | 110   | 58.6753287 | -2.882287826 | 0.46160711 | -6.24402829 | 4.26E-10   | 2.42E-08   |
| BMSK0003865 | 2    | 12   | 6    | 38   | 48    | 56    | 28.1257923 | -2.883314529 | 0.68624728 | -4.2015679  | 2.65E-05   | 0.00058412 |
| BMSK0004542 | 3    | 5    | 1    | 22   | 13    | 25    | 12.1948234 | -2.899381993 | 0.94775762 | -2.92020199 | 0.00221927 | 0.02505748 |
| BMSK0012237 | 35   | 16   | 27   | 132  | 208   | 183   | 101.617782 | -2.911669698 | 0.35625987 | -8.1728816  | 3.01E-16   | 3.19E-14   |
| BMSK0001873 | 153  | 54   | 71   | 134  | 861   | 916   | 360.338905 | -2.959922987 | 0.7571604  | -3.90924166 | 9.26E-05   | 0.00173087 |
| BMSK0013762 | 17   | 2    | 10   | 91   | 62    | 35    | 37.5232707 | -2.961682573 | 0.63355043 | -4.76721464 | 2.92E-06   | 8.08E-05   |
| BMSK0003598 | 1253 | 690  | 1262 | 6170 | 10654 | 5969  | 4367.39312 | -2.965876865 | 0.22416873 | -13.2305557 | 5.85E-40   | 2.81E-37   |
| BMSK0014371 | 26   | 6    | 14   | 94   | 117   | 102   | 60.8907356 | -2.981677555 | 0.45758909 | -6.51605904 | 7.22E-11   | 4.48E-09   |
| BMSK0003095 | 10   | 0    | 1    | 26   | 36    | 9     | 13.506174  | -3.000056206 | 1.02590052 | -2.92431493 | 0.00345215 | 0.03582934 |
| BMSK0010190 | 20   | 8    | 11   | 11   | 141   | 138   | 53.824901  | -3.034781756 | 0.66102426 | -4.59102931 | 4.41E-06   | 0.00011697 |
| BMSK0011949 | 6    | 7    | 2    | 94   | 2     | 5     | 21.9518273 | -3.04467527  | 1.07660395 | -2.82803651 | 0.00468345 | 0.04542653 |
| BMSK0007289 | 45   | 21   | 14   | 274  | 185   | 99    | 110.872205 | -3.04737238  | 0.44815324 | -6.79984451 | 1.05E-11   | 7.13E-10   |
| BMSK0009288 | 8    | 8    | 10   | 42   | 125   | 39    | 38.0741307 | -3.05063866  | 0.59676439 | -5.11196495 | 3.19E-07   | 1.09E-05   |
| BMSK0009296 | 19   | 4    | 13   | 51   | 155   | 66    | 50.3076858 | -3.066050675 | 0.54338547 | -5.64249665 | 1.68E-08   | 7.08E-07   |
| BMSK0015808 | 79   | 44   | 52   | 364  | 459   | 484   | 253.383999 | -3.078832242 | 0.26122304 | -11.7862202 | 4.60E-32   | 1.40E-29   |
| BMSK0006405 | 350  | 135  | 135  | 1636 | 1273  | 1478  | 866.769501 | -3.079800721 | 0.2726732  | -11.294842  | 1.39E-29   | 3.63E-27   |
| BMSK0015122 | 110  | 14   | 22   | 238  | 401   | 370   | 192.939855 | -3.083848576 | 0.43862703 | -7.03068517 | 2.06E-12   | 1.56E-10   |
| BMSK0006130 | 730  | 440  | 348  | 3444 | 3235  | 4844  | 2256.98417 | -3.133024066 | 0.23997542 | -13.0556039 | 5.90E-39   | 2.45E-36   |
| BMSK0009866 | 59   | 48   | 45   | 553  | 307   | 322   | 235.598281 | -3.156883807 | 0.3360907  | -9.39295194 | 5.83E-21   | 8.58E-19   |
| BMSK0002377 | 1444 | 1074 | 1324 | 7467 | 12169 | 11928 | 6021.21726 | -3.174282647 | 0.19229227 | -16.5075932 | 3.24E-61   | 2.68E-58   |
| BMSK0009595 | 101  | 61   | 68   | 456  | 815   | 612   | 356.196792 | -3.18272768  | 0.24324144 | -13.0846441 | 4.03E-39   | 1.75E-36   |
| BMSK0002577 | 3    | 4    | 5    | 28   | 41    | 38    | 20.3777405 | -3.272700528 | 0.73502181 | -4.45252163 | 8.49E-06   | 0.00021097 |
| BMSK0009690 | 12   | 0    | 6    | 75   | 39    | 27    | 27.8517357 | -3.279169606 | 0.76763018 | -4.27180915 | 1.94E-05   | 0.00044333 |
| BMSK0009907 | 200  | 78   | 139  | 480  | 1777  | 1490  | 689.764388 | -3.318792093 | 0.33362783 | -9.94758779 | 2.58E-23   | 4.71E-21   |
| BMSK0015107 | 4    | 2    | 0    | 2    | 36    | 21    | 10.4155029 | -3.427524815 | 1.18895508 | -2.88280429 | 0.00394152 | 0.0396893  |
| BMSK0007184 | 4    | 6    | 6    | 43   | 68    | 53    | 30.7043135 | -3.464909691 | 0.62312017 | -5.5605802  | 2.69E-08   | 1.10E-06   |
| BMSK0010678 | 4    | 0    | 2    | 18   | 13    | 24    | 10.6042904 | -3.466671095 | 1.06686087 | -3.24941254 | 0.00115644 | 0.01476317 |
| BMSK0011830 | 2    | 2    | 6    | 0    | 54    | 54    | 19.3918559 | -3.471672625 | 1.07353082 | -3.23388257 | 0.0012212  | 0.01535597 |
| BMSK0009954 | 40   | 34   | 55   | 376  | 496   | 445   | 248.061392 | -3.48410296  | 0.28436129 | -12.2523814 | 1.63E-34   | 5.51E-32   |
| BMSK0000875 | 2    | 3    | 0    | 16   | 4     | 29    | 9.72953982 | -3.495687682 | 1.20332749 | -2.90501773 | 0.00367232 | 0.03747495 |
| BMSK0009992 | 0    | 6    | 8    | 50   | 64    | 46    | 30.054305  | -3.564859055 | 0.71908658 | -4.95748239 | 7.14E-07   | 2.24E-05   |
| BMSK0005238 | 3    | 4    | 2    | 44   | 16    | 35    | 18.7216921 | -3.598276156 | 0.84736819 | -4.24641404 | 2.17E-05   | 0.00048452 |
| BMSK0013062 | 0    | 4    | 2    | 12   | 42    | 22    | 13.6524449 | -3.652646915 | 1.01102653 | -3.61281014 | 0.0003029  | 0.00489951 |
| BMSK0001010 | 2    | 0    | 4    | 7    | 38    | 26    | 12.6408992 | -3.665380023 | 1.05535529 | -3.47312422 | 0.00051444 | 0.00766864 |
| BMSK0009961 | 18   | 0    | 8    | 105  | 75    | 99    | 53.1015983 | -3.717410586 | 0.59949369 | -6.20091693 | 5.61E-10   | 3.07E-08   |
| BMSK0012286 | 6    | 0    | 3    | 16   | 50    | 40    | 19.0398943 | -3.752427943 | 0.86432835 | -4.34143799 | 1.42E-05   | 0.00033456 |
| BMSK0011753 | 20   | 9    | 8    | 140  | 161   | 142   | 82.4412134 | -3.777079052 | 0.41890255 | -9.01660545 | 1.94E-19   | 2.57E-17   |
| BMSK0010868 | 8    | 0    | 6    | 36   | 65    | 67    | 30.7901274 | -3.786966471 | 0.69506919 | -5.4483302  | 5.08E-08   | 2.01E-06   |
| BMSK0000466 | 2    | 1    | 0    | 19   | 10    | 7     | 6.90185074 | -3.839044957 | 1.36415452 | -2.81423029 | 0.00488942 | 0.04661042 |
| BMSK0010329 | 2    | 6    | 0    | 24   | 44    | 41    | 19.9878998 | -3.849114891 | 0.86234432 | -4.46354757 | 8.86E-06   | 0.00020204 |
| BMSK0009874 | 1    | 0    | 2    | 6    | 20    | 14    | 7.13828365 | -3.852443486 | 1.33591582 | -2.88374718 | 0.00392974 | 0.0396144  |
| BMSK0014589 | 102  | 24   | 64   | 793  | 919   | 648   | 436.748895 | -3.855254551 | 0.30143216 | -12.7897916 | 1.87E-37   | 7.11E-35   |
| BMSK0003071 | 4    | 0    | 4    | 24   | 36    | 42    | 18.7838354 | -3.864762248 | 0.85161556 | -4.53815361 | 5.67E-06   | 0.00014584 |
| BMSK0009693 | 5    | 3    | 4    | 101  | 41    | 13    | 30.0675046 | -3.924592914 | 0.80468337 | -4.87718902 | 1.08E-06   | 3.29E-05   |
| BMSK0001960 | 75   | 53   | 29   | 55   | 859   | 1258  | 388.921664 | -3.925362969 | 1.05899069 | -3.70670204 | 0.00020998 | 0.00354742 |
| BMSK0016067 | 188  | 108  | 76   | 1433 | 1546  | 2008  | 927.839984 | -3.950570463 | 0.25349567 | -15.5843708 | 9.30E-55   | 5.65E-52   |
| BMSK0007474 | 4    | 0    | 0    | 10   | 14    | 27    | 9.39223484 | -3.980962438 | 1.25267376 | -3.17797225 | 0.00148309 | 0.01799232 |
| BMSK0008492 | 2    | 0    | 2    | 28   | 18    | 8     | 10.1898308 | -3.984322007 | 1.17447132 | -3.39243875 | 0.00069273 | 0.00973777 |
| BMSK0009043 | 6    | 30   | 12   | 177  | 289   | 275   | 135.478012 | -3.988184013 | 0.45897983 | -8.68923586 | 3.65E-18   | 4.21E-16   |
| BMSK0010357 | 40   | 40   | 14   | 472  | 402   | 460   | 249.675967 | -4.002102541 | 0.33895295 | -11.8072508 | 3.58E-32   | 1.13E-29   |
| BMSK0011749 | 4    | 0    | 0    | 24   | 8     | 18    | 9.61771754 | -4.013878696 | 1.26165679 | -3.1814347  | 0.00146548 | 0.01784847 |
| BMSK0001599 | 10   | 5    | 9    | 126  | 156   | 66    | 63.5101024 | -4.015475789 | 0.5114491  | -7.85117388 | 4.12E-15   | 4.00E-13   |
| BMSK0007955 | 6    | 2    | 0    | 20   | 82    | 16    | 20.1769542 | -4.026896207 | 0.93024324 | -4.32886373 | 1.50E-05   | 0.00035151 |
| BMSK0001600 | 120  | 27   | 58   | 1548 | 636   | 494   | 516.184996 | -4.029212536 | 0.71962683 | -5.59903048 | 2.16E-08   | 8.98E-07   |
| BMSK0003572 | 55   | 44   | 50   | 67   | 1430  | 1000  | 429.880594 | -4.120854008 | 0.98884134 | -4.1673561  | 3.08E-05   | 0.00066304 |
| BMSK0006966 | 40   | 18   | 18   | 255  | 599   | 360   | 215.43321  | -4.151064231 | 0.33769805 | -12.2922363 | 9.97E-35   | 3.50E-32   |
| BMSK0012362 | 10   | 4    | 0    | 24   | 109   | 95    | 40.0335656 | -4.206246452 | 0.72658028 | -5.789      |            |            |

|             |     |     |     |      |      |       |            |              |            |             |            |            |
|-------------|-----|-----|-----|------|------|-------|------------|--------------|------------|-------------|------------|------------|
| BMSK0007486 | 7   | 4   | 0   | 102  | 74   | 22    | 36.5817167 | -4.401036458 | 0.77405883 | -5.68566143 | 1.30E-08   | 5.71E-07   |
| BMSK0009096 | 0   | 0   | 2   | 8    | 23   | 10    | 7.13642858 | -4.412697111 | 1.4783467  | -2.9848865  | 0.00283684 | 0.03059155 |
| BMSK0015909 | 28  | 0   | 5   | 123  | 92   | 311   | 97.9197464 | -4.412782106 | 1.39305431 | -3.16770284 | 0.00153648 | 0.01849255 |
| BMSK0009536 | 2   | 0   | 0   | 11   | 8    | 16    | 6.46720537 | -4.429019543 | 1.53828874 | -2.87918608 | 0.00398703 | 0.03997107 |
| BMSK0004054 | 0   | 0   | 2   | 12   | 15   | 13    | 7.25840547 | -4.435130001 | 1.45376804 | -3.05078243 | 0.00228246 | 0.02564393 |
| BMSK0010759 | 0   | 0   | 2   | 8    | 12   | 20    | 7.28196465 | -4.438408783 | 1.47276088 | -3.01366558 | 0.00258112 | 0.02830237 |
| BMSK0006689 | 0   | 3   | 0   | 15   | 23   | 25    | 11.4119429 | -4.450521583 | 1.20147592 | -3.70421204 | 0.00021205 | 0.00356923 |
| BMSK0009042 | 8   | 10  | 7   | 123  | 221  | 165   | 90.7411216 | -4.465307717 | 0.44422646 | -10.0518724 | 9.01E-24   | 1.71E-21   |
| BMSK0001423 | 6   | 2   | 9   | 12   | 291  | 80    | 62.8917642 | -4.518793951 | 1.17836367 | -3.83480421 | 0.00012566 | 0.00226121 |
| BMSK0009676 | 34  | 18  | 39  | 841  | 311  | 702   | 350.968403 | -4.575841773 | 0.39193532 | -11.674992  | 1.71E-31   | 4.88E-29   |
| BMSK0015450 | 0   | 0   | 2   | 16   | 21   | 8     | 8.04261972 | -4.592252857 | 1.43640142 | -3.19705398 | 0.00138839 | 0.01711659 |
| BMSK0009995 | 3   | 0   | 2   | 75   | 16   | 6     | 18.8466547 | -4.601947369 | 1.1109334  | -4.14241517 | 3.44E-05   | 0.00073254 |
| BMSK0009932 | 32  | 36  | 46  | 611  | 832  | 1104  | 460.32315  | -4.607240449 | 0.2992043  | -15.3983094 | 1.68E-53   | 9.58E-51   |
| BMSK0002580 | 0   | 4   | 4   | 71   | 47   | 63    | 33.622815  | -4.621340414 | 0.7523465  | -6.14256916 | 8.12E-10   | 4.23E-08   |
| BMSK0013788 | 12  | 8   | 0   | 124  | 128  | 196   | 81.5255047 | -4.6938432   | 0.53852841 | -8.71605501 | 2.88E-18   | 3.41E-16   |
| BMSK0013720 | 0   | 2   | 0   | 18   | 18   | 21    | 10.348342  | -4.934822535 | 1.33997295 | -3.68277772 | 0.00023071 | 0.00385343 |
| BMSK0012640 | 1   | 0   | 0   | 5    | 17   | 10    | 5.44104732 | -4.982877128 | 1.67844745 | -2.96874181 | 0.00299022 | 0.03209383 |
| BMSK0013989 | 4   | 2   | 0   | 72   | 64   | 37    | 31.1635977 | -5.057431315 | 0.81814131 | -6.18161102 | 6.35E-10   | 3.43E-08   |
| BMSK0009057 | 2   | 0   | 0   | 22   | 33   | 3     | 10.0310679 | -5.078067921 | 1.47227063 | -3.44914028 | 0.00056237 | 0.00814372 |
| BMSK0005228 | 26  | 27  | 18  | 805  | 661  | 742   | 400.647857 | -5.12921287  | 0.30198816 | -16.9848147 | 1.06E-64   | 9.71E-62   |
| BMSK0013763 | 12  | 15  | 22  | 562  | 568  | 508   | 293.966424 | -5.203787914 | 0.3284497  | -15.8434849 | 1.56E-56   | 1.02E-53   |
| BMSK0014683 | 0   | 1   | 2   | 39   | 30   | 41    | 19.9877854 | -5.343725034 | 1.05192783 | -5.07993505 | 3.78E-07   | 1.24E-05   |
| BMSK0001558 | 202 | 186 | 187 | 6476 | 3737 | 10476 | 3794.7913  | -5.349138473 | 0.50233198 | -10.6486122 | 1.77E-26   | 3.67E-24   |
| BMSK0011814 | 0   | 0   | 0   | 11   | 8    | 2     | 3.70729491 | -5.416812763 | 1.93569046 | -2.7983879  | 0.00513584 | 0.04840316 |
| BMSK0008724 | 18  | 18  | 18  | 808  | 627  | 758   | 396.35164  | -5.516516282 | 0.3196556  | -17.2576867 | 9.80E-67   | 9.93E-64   |
| BMSK0010704 | 0   | 0   | 0   | 12   | 4    | 6     | 4.02093437 | -5.530333265 | 1.87329803 | -2.95219082 | 0.00315528 | 0.03344743 |
| BMSK0001711 | 0   | 0   | 0   | 8    | 14   | 2     | 4.01917302 | -5.539238399 | 1.89276674 | -2.92652986 | 0.00342767 | 0.03569703 |
| BMSK0007002 | 174 | 135 | 118 | 8818 | 103  | 7578  | 3164.54445 | -5.543238355 | 1.35870364 | -4.07979944 | 4.51E-05   | 0.00093035 |
| BMSK0015125 | 0   | 0   | 0   | 6    | 12   | 6     | 4.04571659 | -5.548506764 | 1.83896701 | -3.01718668 | 0.00255133 | 0.02805229 |
| BMSK0013867 | 0   | 0   | 0   | 1    | 13   | 11    | 4.11417923 | -5.575231305 | 1.91645554 | -2.90913678 | 0.00362428 | 0.03719272 |
| BMSK0015642 | 0   | 0   | 0   | 4    | 18   | 4     | 4.19457942 | -5.605374913 | 1.86302528 | -3.00874871 | 0.00262326 | 0.02859082 |
| BMSK0007168 | 4   | 0   | 2   | 65   | 68   | 124   | 45.9571278 | -5.63797466  | 0.7731963  | -7.29177654 | 3.06E-13   | 2.56E-11   |
| BMSK0011315 | 1   | 0   | 0   | 31   | 16   | 0     | 8.58230768 | -5.644368399 | 1.73260521 | -3.25773487 | 0.00112305 | 0.0143899  |
| BMSK0012105 | 2   | 0   | 0   | 20   | 43   | 26    | 15.2606913 | -5.660869551 | 1.27839813 | -4.42809593 | 9.51E-06   | 0.00023315 |
| BMSK0009224 | 12  | 0   | 0   | 162  | 182  | 109   | 79.9700434 | -5.66266468  | 1.63310364 | -3.46742517 | 0.00052547 | 0.00773204 |
| BMSK0008247 | 0   | 0   | 1   | 0    | 23   | 32    | 9.34848346 | -5.768932521 | 1.69416736 | -3.40517275 | 0.00066122 | 0.00936697 |
| BMSK0004543 | 5   | 0   | 0   | 53   | 43   | 129   | 40.5532286 | -5.772285887 | 0.89352971 | -6.46009393 | 1.05E-10   | 6.24E-09   |
| BMSK0002407 | 22  | 10  | 0   | 270  | 743  | 507   | 259.537528 | -5.784553639 | 1.16028527 | -4.98545814 | 6.18E-07   | 1.96E-05   |
| BMSK0015888 | 0   | 0   | 0   | 18   | 3    | 5     | 4.86508521 | -5.803501957 | 1.8294189  | -3.17231989 | 0.00151226 | 0.01829758 |
| BMSK0003879 | 0   | 0   | 0   | 4    | 14   | 11    | 4.85050563 | -5.811312571 | 1.76517145 | -3.29220856 | 0.00099404 | 0.01312489 |
| BMSK0014496 | 53  | 13  | 14  | 1349 | 1677 | 974   | 700.869641 | -5.871963829 | 0.32404478 | -18.1208409 | 1.8E-73    | 2.49E-70   |
| BMSK0013907 | 0   | 0   | 0   | 11   | 11   | 8     | 5.23215418 | -5.915392209 | 1.71132251 | -3.45662036 | 0.00054699 | 0.00794623 |
| BMSK0001462 | 0   | 0   | 0   | 4    | 17   | 12    | 5.4790076  | -5.987849984 | 1.71839222 | -3.48456536 | 0.00049294 | 0.00740867 |
| BMSK0014006 | 0   | 0   | 0   | 8    | 7    | 17    | 5.66004041 | -6.027709113 | 1.70038506 | -3.5449083  | 0.00039275 | 0.00611979 |
| BMSK0005700 | 0   | 0   | 0   | 21   | 2    | 8     | 5.83973898 | -6.067012543 | 1.77432207 | -3.4193412  | 0.00062773 | 0.00893413 |
| BMSK0014587 | 0   | 0   | 0   | 6    | 10   | 19    | 6.07675857 | -6.132348451 | 1.67473772 | -3.66167691 | 0.00025057 | 0.00411882 |
| BMSK0009878 | 0   | 0   | 0   | 2    | 33   | 4     | 6.0496767  | -6.135983638 | 1.78693536 | -4.43838028 | 0.00059518 | 0.00851066 |
| BMSK0004737 | 0   | 0   | 0   | 24   | 3    | 7     | 6.39679393 | -6.198515184 | 1.73145021 | -3.57995577 | 0.00034365 | 0.00548101 |
| BMSK0009577 | 0   | 0   | 0   | 14   | 2    | 20    | 6.62230307 | -6.251016059 | 1.71540726 | -3.64404198 | 0.00026839 | 0.00438018 |
| BMSK0014620 | 0   | 2   | 8   | 182  | 290  | 272   | 129.483812 | -6.266066258 | 0.96658873 | -6.48266014 | 9.01E-11   | 5.52E-09   |
| BMSK0013919 | 8   | 6   | 8   | 461  | 564  | 545   | 275.744812 | -6.31653901  | 0.38745057 | -16.3028256 | 9.42E-60   | 6.61E-57   |
| BMSK0005743 | 0   | 0   | 0   | 26   | 10   | 2     | 6.93969641 | -6.318764424 | 1.71491311 | -3.68459742 | 0.00022906 | 0.00383441 |
| BMSK0010362 | 0   | 0   | 0   | 16   | 17   | 8     | 7.10825336 | -6.358095807 | 1.6008817  | -3.97162126 | 7.14E-05   | 0.00138563 |
| BMSK0008560 | 14  | 0   | 8   | 1113 | 51   | 304   | 282.850038 | -6.488364322 | 1.62772244 | -3.98616138 | 6.72E-05   | 0.00131181 |
| BMSK0004151 | 0   | 0   | 1   | 52   | 23   | 14    | 16.2890341 | -6.573622841 | 1.42184194 | -4.62331478 | 3.78E-06   | 0.00010104 |
| BMSK0012354 | 0   | 0   | 0   | 4    | 22   | 25    | 8.5582541  | -6.629829435 | 1.58651101 | -4.17887388 | 2.93E-05   | 0.00064092 |
| BMSK0013759 | 0   | 0   | 0   | 17   | 19   | 15    | 8.85816822 | -6.6755473   | 1.51695957 | -4.4006099  | 1.08E-05   | 0.00025984 |
| BMSK0008716 | 1   | 0   | 0   | 51   | 7    | 38    | 17.9574843 | -6.718329665 | 1.44334312 | -4.65470032 | 3.24E-06   | 8.86E-05   |
| BMSK0003983 | 0   | 0   | 0   | 7    | 48   | 7     | 9.81128178 | -6.83168533  | 1.57896647 | -4.32668169 | 1.51E-05   | 0.0003541  |
| BMSK0009888 | 1   | 0   | 0   | 42   | 27   | 42    | 19.9096915 | -6.870382825 | 1.35281332 | -5.078589   | 3.80E-07   | 1.25E-05   |
| BMSK0001598 | 0   | 0   | 4   | 183  | 84   | 161   | 77.8935009 | -6.892483393 | 1.26597717 | -5.44439786 | 5.20E-08   | 2.04E-06   |
| BMSK0011430 | 0   | 0   | 0   | 33   | 14   | 10    | 10.3415355 | -6.894471198 | 1.52224745 | -4.52913958 | 5.92E-06   | 0.00015092 |
| BMSK0002215 | 0   | 0   | 0   | 10   | 32   | 20    | 10.3324976 | -6.90249479  | 1.49246619 | -4.62489191 | 3.75E-06   | 0.00010057 |
| BMSK0010199 | 0   | 0   | 0   | 12   | 19   | 31    | 10.7488734 | -6.955258658 | 1.48442698 | -4.68548387 | 2.79E-06   | 7.79E-05   |
| BMSK0006712 | 0   | 0   | 0   | 25   | 18   | 20    | 11.690031  | -7.007663928 | 1.46250708 | -4.79154188 | 1.66E-06   | 4.89E-05   |
| BMSK0013765 | 0   | 0   | 12  | 519  | 482  | 498   | 264.944751 | -7.037110214 | 1.85471856 | -3.79416607 | 0.00014814 | 0.00259901 |
| BMSK0011815 | 0   | 0   | 0   | 48   | 9    | 6     | 11.8086467 | -7.084525899 | 1.56616188 | -4.5234953  | 6.08E-06   | 0.00015457 |
| BMSK0008470 | 0   | 0   | 0   | 28   | 16   | 26    | 12.5317277 | -7.172891874 | 1.44467194 | -4.96506625 | 6.87E-07   | 2.16E-05   |
| BMSK0011813 | 0   | 0   | 0   | 25   | 32   | 16    | 12.5483263 | -7.179069313 | 1.43544893 | -5.00127113 | 5.70E-07   | 1.82E-05   |
| BMSK0010361 | 0   | 0   | 0   | 24   | 14   | 34    | 12.8843019 | -7.213285359 | 1.44856652 | -4.97960241 | 6.37E-07   | 2.01E-05   |
| BMSK0003890 | 0   | 0   | 0   | 24   | 22   | 28    | 13.0066211 | -7.228491716 | 1.42398219 | -5.0762515  | 3.85E-07   | 1.25E-05   |
| BMSK0004789 | 0   | 0   | 0   | 25   | 26   | 24    | 13.0840369 | -7.237807146 | 1.41898892 | -5.10067912 | 3.38E-07   | 1.15E-05   |
| BMSK0003735 | 0   | 0   | 0   | 56   | 14   | 1     | 13.225228  | -7.253220303 | 2.48922617 | -2.91384543 | 0.00357007 | 0.03671896 |
| BMSK0009882 | 11  | 13  | 4   | 1043 | 1561 | 1306  | 676.256792 | -7.26913437  | 0.34492762 | -21.074398  | 1.37E-98   | 2.08E-95   |
| BMSK0003829 | 4   | 0   | 0   | 146  | 270  | 166   | 99.2370626 | -7.348526171 | 0.80814964 | -9.09032664 | 9.63E-20   | 1.31E-17   |
| BMSK0013761 | 4   | 2   | 0   | 261  | 464  | 205   | 158.133328 | -7.418704883 | 0.67517326 | -10.9878535 | 4.37E-28   | 9.97E-26   |
| BMSK0014005 | 0   | 0   | 0   | 29   | 31   | 31    | 15.8697652 | -7.516367113 | 1.38120199 | -5.44190289 | 5.27E-08   | 8.06E-06   |
| BMSK0011847 | 37  | 24  | 34  | 5728 | 4821 | 6133  | 2956.12141 | -7.640976102 | 0.25857963 | -29.5497988 | 6.61E-192  | 3.01E-188  |
| BMSK0011812 | 0   | 0   | 0   | 56   | 26   | 16    | 17.7112219 | -7.671530986 | 1.41159737 | -5.43464527 | 5.49E-08   | 2.13E-06   |
| BMSK0003797 | 0   | 0   | 0   | 32   | 48   | 28    | 18.4641733 | -7.737009548 | 1.35809959 | -5.69693827 | 1.22E-08   | 5.40E-07   |
| BMSK0015229 | 1   | 0   | 0   | 70   | 75   | 65    | 36.6953969 | -7.759126384 | 1.27453983 | -6.08778652 | 1.14E-09   | 5.80E-08   |
| BMSK0008715 | 6   | 8   | 2   | 1499 | 427  | 1195  | 573.826559 | -7.817180664 | 0.84049772 | -9.30065656 | 1.40E-20   | 2.02E-18   |
| BMSK0009868 | 0   | 0   | 2   | 81   | 183  | 165   | 73.1559826 | -7.868875183 | 1.09459293 | -7.18885984 | 6.53E-13   | 5.18E-11   |
| BMSK0009865 | 0   | 0   | 0   | 38   | 48   | 35    | 20.8922393 | -7.914144762 | 1.33714104 | -5.91870606 |            |            |

|             |    |    |    |       |       |       |            |              |            |             |           |           |
|-------------|----|----|----|-------|-------|-------|------------|--------------|------------|-------------|-----------|-----------|
| BMSK0000571 | 0  | 0  | 0  | 32    | 62    | 83    | 30.4205126 | -8.456944781 | 1.31164784 | -6.44757268 | 1.14E-10  | 6.69E-09  |
| BMSK0002568 | 0  | 0  | 0  | 86    | 18    | 62    | 30.62559   | -8.461439522 | 1.35904442 | -6.22602133 | 4.78E-10  | 2.66E-08  |
| BMSK0016014 | 3  | 1  | 5  | 1377  | 557   | 891   | 513.777579 | -8.517673881 | 0.78689978 | -10.824344  | 2.64E-27  | 5.73E-25  |
| BMSK0009864 | 8  | 10 | 5  | 2132  | 3062  | 2631  | 1350.72546 | -8.555926349 | 0.35531464 | -24.0798589 | 4.06E-128 | 7.42E-125 |
| BMSK0009902 | 37 | 26 | 36 | 8768  | 15448 | 14003 | 6553.42016 | -8.730257697 | 0.24543848 | -35.570044  | 4.07E-277 | 3.71E-273 |
| BMSK0003734 | 0  | 0  | 0  | 136   | 65    | 14    | 38.8348862 | -8.807908061 | 1.83662469 | -4.79570384 | 1.62E-06  | 4.82E-05  |
| BMSK0009914 | 0  | 0  | 0  | 162   | 20    | 40    | 41.841205  | -8.915186527 | 1.91245026 | -4.66165667 | 3.14E-06  | 8.62E-05  |
| BMSK0003699 | 0  | 0  | 0  | 167   | 30    | 32    | 42.8821065 | -8.950628216 | 1.85412947 | -4.82740195 | 1.38E-06  | 4.16E-05  |
| BMSK0009091 | 0  | 0  | 0  | 131   | 43    | 67    | 44.0642784 | -8.986822925 | 1.30661531 | -6.87794095 | 6.07E-12  | 4.26E-10  |
| BMSK0013909 | 0  | 0  | 0  | 51    | 81    | 131   | 45.5856943 | -9.039707582 | 1.2810684  | -7.05638167 | 1.71E-12  | 1.31E-10  |
| BMSK0009854 | 0  | 0  | 0  | 66    | 110   | 112   | 49.4550126 | -9.158006948 | 1.25892457 | -7.27446834 | 3.48E-13  | 2.88E-11  |
| BMSK0014588 | 0  | 0  | 0  | 89    | 162   | 96    | 58.870467  | -9.41045233  | 1.24810029 | -7.53982064 | 4.71E-14  | 4.29E-12  |
| BMSK0002738 | 0  | 0  | 0  | 109   | 84    | 211   | 71.7172444 | -9.691927204 | 1.26421518 | -7.66635884 | 1.77E-14  | 1.66E-12  |
| BMSK0015151 | 0  | 0  | 0  | 236   | 155   | 110   | 89.074625  | -10.00421846 | 1.24790279 | -8.01682513 | 1.09E-15  | 1.09E-13  |
| BMSK0000089 | 0  | 0  | 0  | 208   | 156   | 189   | 97.9120401 | -10.14076223 | 1.23118677 | -8.23657503 | 1.77E-16  | 1.90E-14  |
| BMSK0004790 | 0  | 0  | 0  | 260   | 187   | 134   | 102.861595 | -10.21211165 | 1.23842666 | -8.24603667 | 1.64E-16  | 1.78E-14  |
| BMSK0001557 | 8  | 2  | 4  | 5606  | 1947  | 6980  | 2641.03329 | -10.30392455 | 0.80607302 | -12.7828675 | 2.04E-37  | 7.46E-35  |
| BMSK0005075 | 0  | 0  | 0  | 153   | 226   | 301   | 117.718469 | -10.40843777 | 1.22827443 | -8.47403275 | 2.37E-17  | 2.61E-15  |
| BMSK0014854 | 0  | 0  | 0  | 246   | 321   | 225   | 136.503541 | -10.62219271 | 1.21457829 | -8.74558093 | 2.22E-18  | 2.70E-16  |
| BMSK0005229 | 0  | 0  | 0  | 266   | 354   | 180   | 137.288413 | -10.63067994 | 1.22165583 | -8.70186157 | 3.26E-18  | 3.82E-16  |
| BMSK0009950 | 0  | 0  | 0  | 207   | 229   | 388   | 144.322809 | -10.70175101 | 1.22751355 | -8.71823454 | 2.83E-18  | 3.39E-16  |
| BMSK0005586 | 2  | 0  | 0  | 972   | 1160  | 1214  | 581.640985 | -10.88128602 | 1.04488295 | -10.4138803 | 2.14E-25  | 4.25E-23  |
| BMSK0009867 | 0  | 0  | 1  | 465   | 1435  | 892   | 465.880114 | -11.43164739 | 1.21480683 | -9.41025939 | 4.95E-21  | 7.40E-19  |
| BMSK0010335 | 0  | 0  | 0  | 675   | 102   | 832   | 296.408845 | -11.74058715 | 1.81628997 | -6.46404888 | 1.02E-10  | 6.12E-09  |
| BMSK0005884 | 0  | 0  | 0  | 634   | 643   | 521   | 313.650022 | -11.82173155 | 1.20333978 | -9.824101   | 8.87E-23  | 1.50E-20  |
| BMSK0001556 | 0  | 2  | 0  | 3092  | 1049  | 3839  | 1450.24427 | -12.10992367 | 1.37457513 | -8.80993946 | 1.25E-18  | 1.56E-16  |
| BMSK0009059 | 6  | 4  | 0  | 14933 | 13262 | 16912 | 7939.03927 | -12.33104173 | 0.50500499 | -24.4176631 | 1.11E-131 | 2.53E-128 |
| BMSK0003800 | 0  | 0  | 0  | 2731  | 1010  | 335   | 745.282843 | -13.07084707 | 1.80953673 | -7.22331127 | 5.07E-13  | 4.13E-11  |
| BMSK0001555 | 0  | 0  | 0  | 6309  | 2037  | 7827  | 2941.76907 | -15.05170536 | 1.52239691 | -9.88684705 | 4.75E-23  | 8.33E-21  |
