# Supplementary material for: BmAbl1 Regulates Silk Protein Synthesis via Glutathione Metabolism in Bombyx mori
Source: MDPI journal article supplement (doi:10.3390/insects13110967), 2022-10-22
Supplement: s1 [file s1]

**Table S1.** The primers used to qRT-PCR.

| Gene        |   | Sequence (5'-3')          | Efficiency |
|-------------|---|---------------------------|------------|
| BMSK0001189 | F | GCCGTTACAGCCAAGAACC       | 106%       |
|             | R | CCACCGGGGACTTTTCAGTTTG    |            |
| BMSK0001495 | F | AAATCCTTGACGCAGCCGGT      | 105%       |
|             | R | CTCCATTCTCCCCTGCGTA       |            |
| BMSK0003392 | F | ACTGCTTGTTGACCTGCTTTTATTT | 105%       |
|             | R | AGTGGAACCAGCAGGAGAACA     |            |
| BMSK0005067 | F | GAGCACGGAATGAAGGTAGGAGT   | 102%       |
|             | R | GTTGGCTCCTGCATTGGCAC      |            |
| BMSK0005586 | F | CACTGACACCCGCCTTTGGA      | 102%       |
|             | R | AGCCCATGCGTGACTCAACAA     |            |
| BMSK0007210 | F | ACTTTTTCGTGTTACGACGCTTCT  | 94%        |
|             | R | CGGTGGATATGTCCAAGTGTTCG   |            |
| BMSK0009961 | F | TTGGACCGGCGCACATACT       | 102%       |
|             | R | ACCTCTGTCTGAAACAGCCCC     |            |
| BMSK0001869 | F | TGCAAGATGGCAAGGTGTCC      | 98%        |
|             | R | CTGGCTTCTTTGTAGCGTGC      |            |
| BMSK0003439 | F | AAGAGCGGAAAAATGCCCGT      | 95%        |
|             | R | ATAACAGCACGACAAGGCGG      |            |
| BMSK0003598 | F | CAGCGAAGGCGCTCAACTTA      | 103%       |
|             | R | AGCATCAAAACCATTCGTGACTTA  |            |
| BMSK0003984 | F | TGATTGGGACAGCCACGC        | 103%       |
|             | R | ACGCTCTTTCTTGGGCTCG       |            |
| BMSK0006071 | F | CAAGAATCGGTCTCCACGCC      | 100%       |
|             | R | GGGGTTTGTGCCGGTCTATG      |            |
| BMSK0006405 | F | TGTTGCTGCGTACCACAAGG      | 98%        |
|             | R | TCCAGGTTCACTTCCGTCCA      |            |
| BMSK0012237 | F | TACGCCAACAAGACACACCG      | 106%       |
|             | R | TAGTGCCCTTTTACTCTGTATCCTT |            |
| Fib-L       | F | ATACCGATTGGTCACATAACAG    | 105%       |

---

|       |   |                          |      |
|-------|---|--------------------------|------|
|       | R | GCAGATAGATGGGCGATAA      |      |
| Fib-H | F | TCTGTGTCATCTGCTTCATCTCG  | 100% |
|       | R | TATCCAGGACGAAGTAAGAAACAA |      |
| p25   | F | AGCCGCTGTGGCAGTTTTG      | 97%  |
|       | R | TAGGTGGCGTTGAAGTATG      |      |
| Ser1  | F | GATTGCGTTGGCTGCGCT       | 102% |
|       | R | CCGTTCCGATCGCTGTGATA     |      |
| BmAbl | F | TCAAGGACGATACGATGGCGC    | 101% |
|       | R | GTGTTGTAGGCCAGACCCTCC    |      |

---
