# Supplementary material for: BmAbl1 Regulates Silk Protein Synthesis via Glutathione Metabolism in Bombyx mori
Source: MDPI journal article supplement (doi:10.3390/insects13110967), 2022-10-22
Supplement: s1 [file s1]

**Table S2.** The primers used to construct pXL-[RFP-U6-BmAbl1-sgRNA].

| Primer        | Sequence (5'-3')                                      |
|---------------|-------------------------------------------------------|
| Abl1-sgRNA1.F | GGCGTCGACGGTGGGCGCGGCGGCCTCGTGTTTTAGAGCTAGAAATAGCAAGT |
| sgRNA1.R      | ATGGTCGACAAAAAAGCACCGACTCGGTGCCA                      |
| Abl1-sgRNA2.F | GGCGTCGACGGGGATCGTCCTCTTCGTGAGTTTTAGAGCTAGAAATAGCAAGT |
| sgRNA2.R      | ATGGCTAGCAAAAAAAGCACCGACTCGGTGCCA                     |
