# Supplementary material for: BmAbl1 Regulates Silk Protein Synthesis via Glutathione Metabolism in Bombyx mori
Source: MDPI journal article supplement (doi:10.3390/insects13110967), 2022-10-22
Supplement: s1 [file s1]

**Table S6 KEGG enrichment analysis of DEGs**

| Term                                         | ID        | Input | Background | P Value    | Corrected P Value | Input                                                                                                                                                                                                                                                                                                                                                                                                                                                                                                                                                                                                                                                                                                                                                                                                       |
|----------------------------------------------|-----------|-------|------------|------------|-------------------|-------------------------------------------------------------------------------------------------------------------------------------------------------------------------------------------------------------------------------------------------------------------------------------------------------------------------------------------------------------------------------------------------------------------------------------------------------------------------------------------------------------------------------------------------------------------------------------------------------------------------------------------------------------------------------------------------------------------------------------------------------------------------------------------------------------|
| Glutathione metabolism                       | bmor00480 | 10    | 54         | 2.33E-04   | 0.011329952       | BMSK0012237 BMSK0004409 BMSK0003439 BMSK0006405 BMSK0001869 BMSK0006071 BMSK0003983 BMSK0003984 BMSK0011959 BMSK0003598                                                                                                                                                                                                                                                                                                                                                                                                                                                                                                                                                                                                                                                                                     |
| Drug metabolism - other enzymes              | bmor00983 | 13    | 93         | 0.00034925 | 0.011329952       | BMSK0003983 BMSK0007289 BMSK0003439 BMSK0016013 BMSK0015552 BMSK0009882 BMSK0003961 BMSK0016014 BMSK0015906 BMSK0012237 BMSK0003984 BMSK0016011 BMSK0003598                                                                                                                                                                                                                                                                                                                                                                                                                                                                                                                                                                                                                                                 |
| Drug metabolism - cytochrome P450            | bmor00982 | 10    | 58         | 0.00038625 | 0.011329952       | BMSK0003983 BMSK0007289 BMSK0003439 BMSK0003598 BMSK0003961 BMSK0016014 BMSK0012237 BMSK0003984 BMSK0016011 BMSK0016013                                                                                                                                                                                                                                                                                                                                                                                                                                                                                                                                                                                                                                                                                     |
| Metabolism of xenobiotics by cytochrome P450 | bmor00980 | 10    | 64         | 0.0007679  | 0.016893788       | BMSK0003983 BMSK0007289 BMSK0003439 BMSK0003598 BMSK0003961 BMSK0016014 BMSK0012237 BMSK0003984 BMSK0016011 BMSK0016013                                                                                                                                                                                                                                                                                                                                                                                                                                                                                                                                                                                                                                                                                     |
| Tyrosine metabolism                          | bmor00350 | 7     | 34         | 0.00117191 | 0.020625572       | BMSK0001189 BMSK0012908 BMSK0012909 BMSK0005604 BMSK0002040 BMSK0004278 BMSK0004276                                                                                                                                                                                                                                                                                                                                                                                                                                                                                                                                                                                                                                                                                                                         |
| Metabolic pathways                           | bmor01100 | 65    | 1142       | 0.01095002 | 0.160600234       | BMSK0009961 BMSK0010319 BMSK0016048 BMSK0004409 BMSK0003439 BMSK0013883 BMSK0013101 BMSK0014113 BMSK0002040 BMSK0006405 BMSK0009882 BMSK0005067 BMSK0015906 BMSK0004276 BMSK0012237 BMSK0002846 BMSK0003598 BMSK0013141 BMSK0001495 BMSK0007275 BMSK0009445 BMSK0002496 BMSK0001159 BMSK0009441 BMSK0007486 BMSK0014693 BMSK0005586 BMSK0005850 BMSK0009950 BMSK0007289 BMSK0001494 BMSK0011062 BMSK0012908 BMSK0012909 BMSK0015552 BMSK0011266 BMSK0005604 BMSK0015169 BMSK0003961 BMSK0016014 BMSK0001125 BMSK0001126 BMSK0004278 BMSK0016011 BMSK0016013 BMSK0007184 BMSK0007523 BMSK0009224 BMSK0004631 BMSK0001189 BMSK0009430 BMSK0012277 BMSK0004756 BMSK0003392 BMSK0000579 BMSK0011000 BMSK0006071 BMSK0008722 BMSK0003863 BMSK0001869 BMSK0007210 BMSK0003983 BMSK0003984 BMSK0003840 BMSK0011959 |
| Phenylalanine metabolism                     | bmor00360 | 3     | 11         | 0.01724719 | 0.216812673       | BMSK0004276 BMSK0002040 BMSK0004278                                                                                                                                                                                                                                                                                                                                                                                                                                                                                                                                                                                                                                                                                                                                                                         |
| Retinol metabolism                           | bmor00830 | 6     | 47         | 0.01971024 | 0.216812673       | BMSK0007289 BMSK0001392 BMSK0003961 BMSK0016014 BMSK0016011 BMSK0016013                                                                                                                                                                                                                                                                                                                                                                                                                                                                                                                                                                                                                                                                                                                                     |
| Ascorbate and aldarate metabolism            | bmor00053 | 6     | 52         | 0.02937897 | 0.279206284       | BMSK0007289 BMSK0009224 BMSK0003961 BMSK0016014 BMSK0016011 BMSK0016013                                                                                                                                                                                                                                                                                                                                                                                                                                                                                                                                                                                                                                                                                                                                     |
| Glycine, serine and threonine metabolism     | bmor00260 | 5     | 39         | 0.03172799 | 0.279206284       | BMSK0009961 BMSK0001494 BMSK0009950 BMSK0001495 BMSK0014693                                                                                                                                                                                                                                                                                                                                                                                                                                                                                                                                                                                                                                                                                                                                                 |
| Phototransduction - fly                      | bmor04745 | 4     | 28         | 0.03906906 | 0.312552515       | BMSK0004449 BMSK0009907 BMSK0009902 BMSK0009901                                                                                                                                                                                                                                                                                                                                                                                                                                                                                                                                                                                                                                                                                                                                                             |
| Biosynthesis of amino acids                  | bmor01230 | 7     | 75         | 0.04826475 | 0.353941506       | BMSK0005586 BMSK0007210 BMSK0003392 BMSK0013101 BMSK0005067 BMSK0013141 BMSK0014693                                                                                                                                                                                                                                                                                                                                                                                                                                                                                                                                                                                                                                                                                                                         |
