# Supplementary figures and images for: BmAbl1 Regulates Silk Protein Synthesis via Glutathione Metabolism in Bombyx mori
Source: MDPI journal article supplement (doi:10.3390/insects13110967), 2022-10-22

## GLUTATHIONE METABOLISM

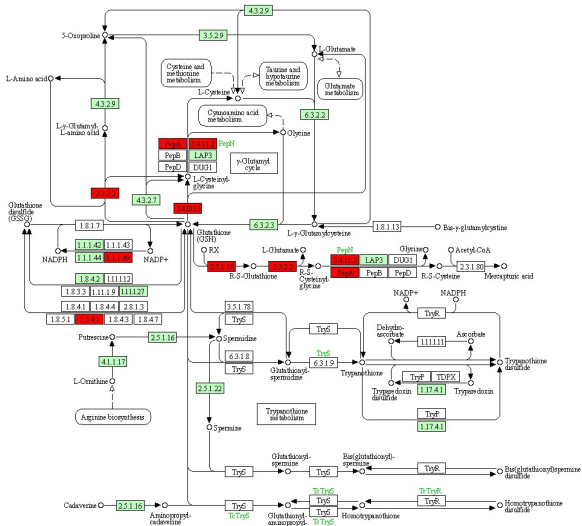

Supplement: s1 [file s1]

## GLYCINE, SERINE AND THREONINE METABOLISM

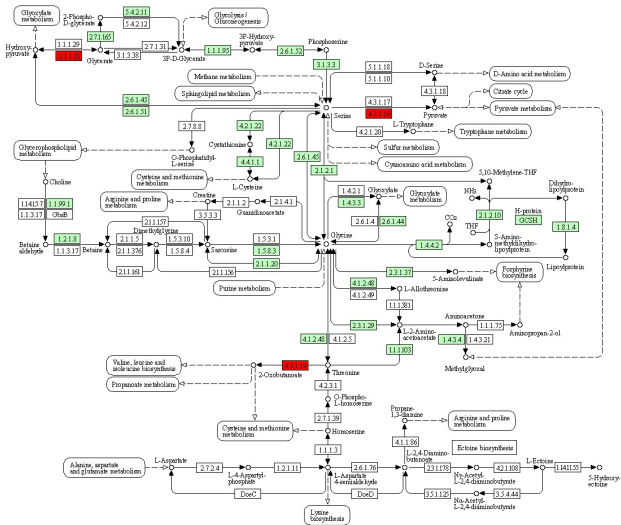

Supplement: s1 [file s1]
